# Supplementary material
Source: PubMed Central journal article supplement (PMC5492227)

# Supporting Information

## Identification of Novel

### 2-(Benzo[*d*]isoxazol-3-yl)-2-oxo-*N*-phenylacetohydrazonoyl Cyanide

### Analogues as Potent EPAC Antagonists

Na Ye,<sup>a,c,1</sup> Yingmin Zhu,<sup>b,1</sup> Zhiqing Liu,<sup>a</sup> Fang C. Mei,<sup>b</sup> Haiying Chen,<sup>a</sup> Pingyuan

Wang,<sup>a</sup> Xiaodong Cheng,<sup>b,\*\*</sup> and Jia Zhou<sup>a,\*</sup>

<sup>a</sup>Chemical Biology Program, Department of Pharmacology and Toxicology, University of Texas Medical Branch, Galveston, Texas 77555, United States

<sup>b</sup>Department of Integrative Biology and Pharmacology, Texas Therapeutics Institute, The University of Texas Health Science Center, Houston, Texas 77030, United States

<sup>c</sup>Department of Medicinal Chemistry, College of Pharmaceutical Sciences, Soochow University, Suzhou, Jiangsu 215123, China

## Table of Contents

Copies of <sup>1</sup>H and <sup>13</sup>C NMR spectra page 2-29

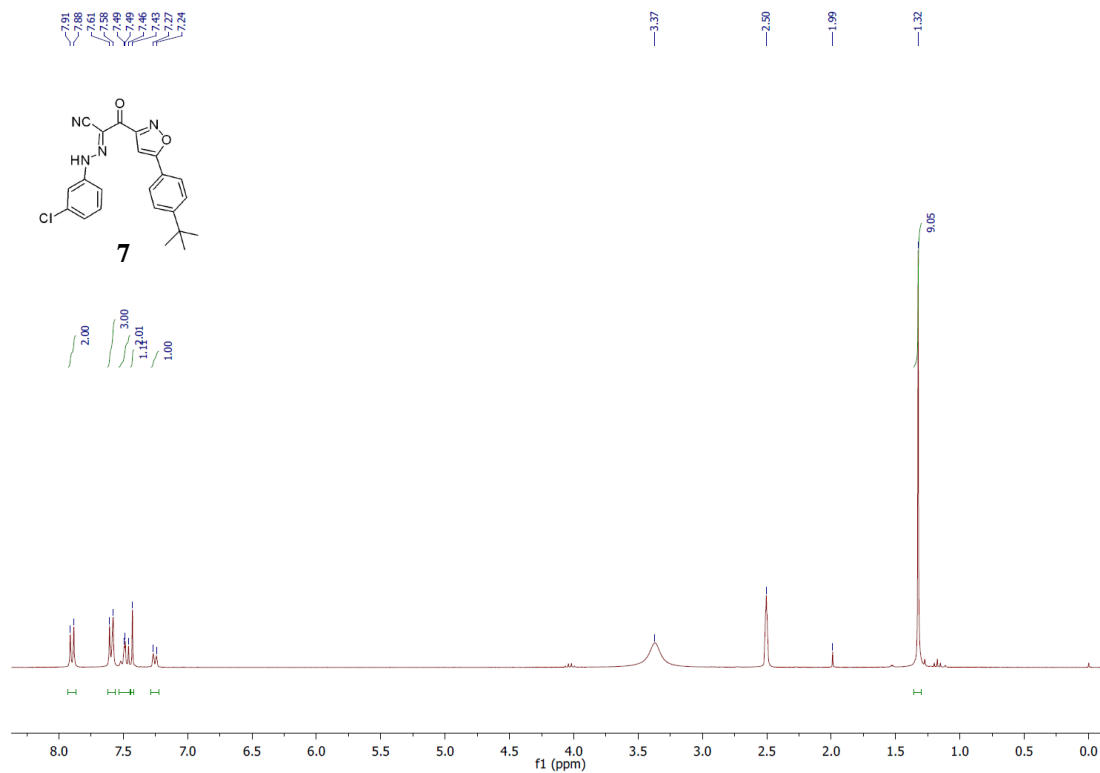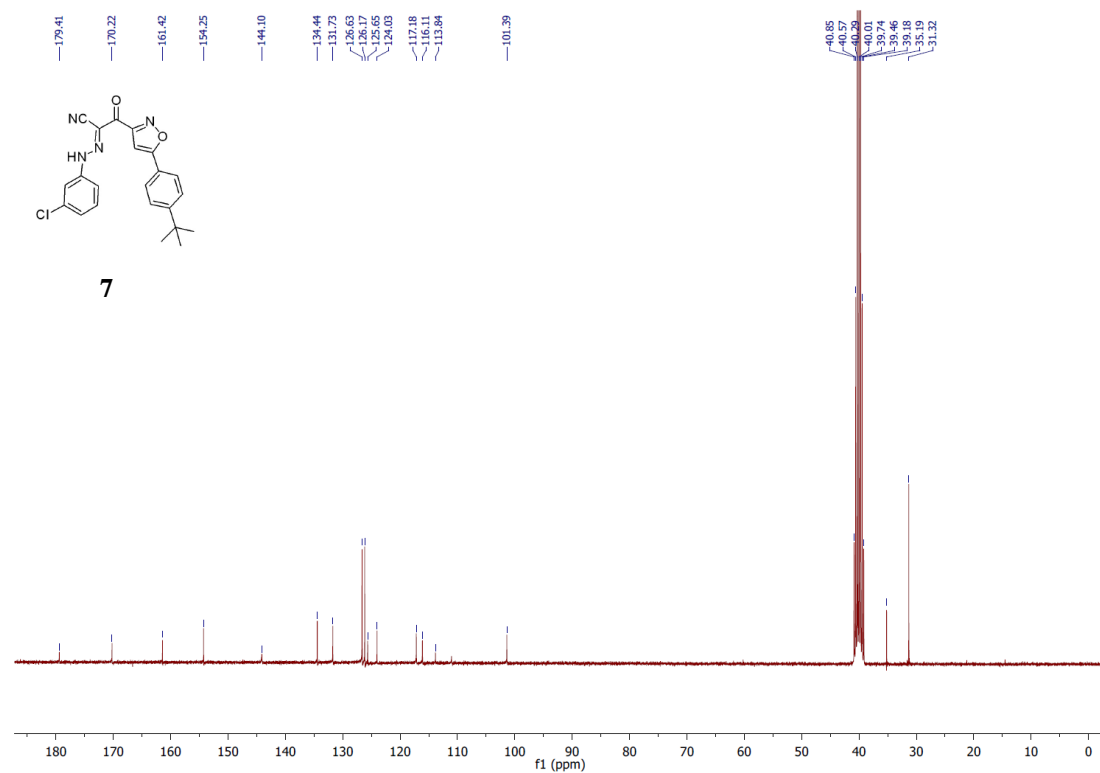

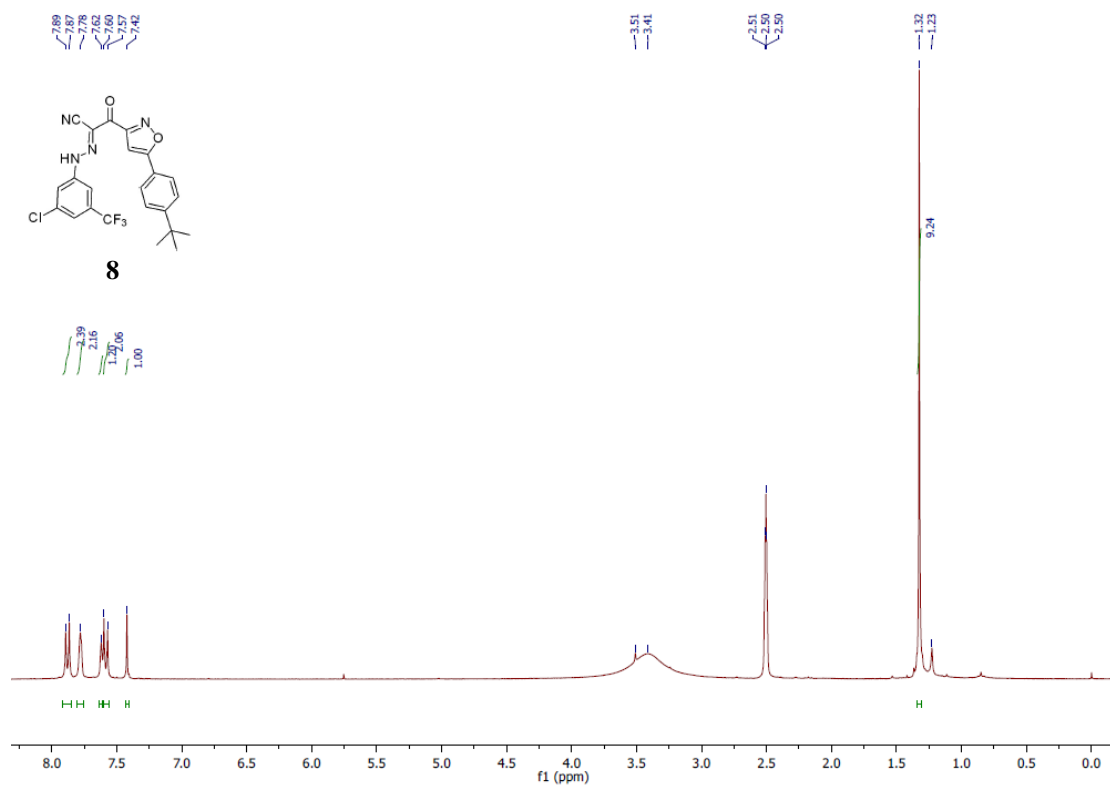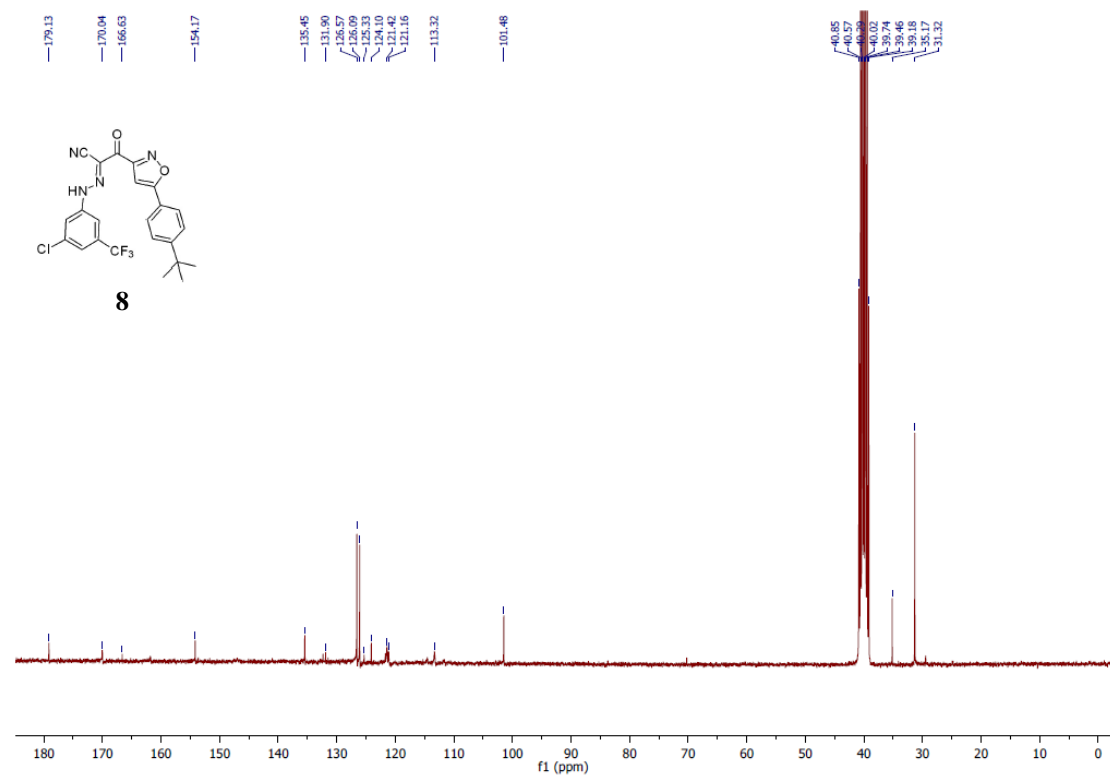

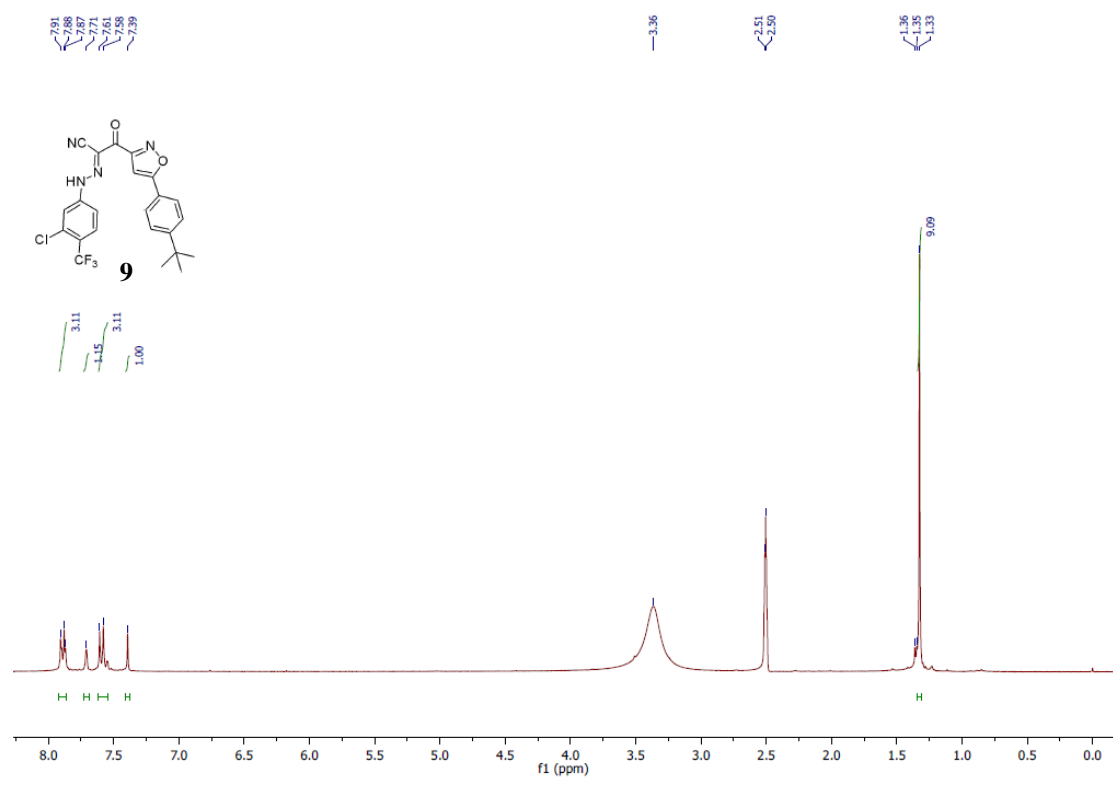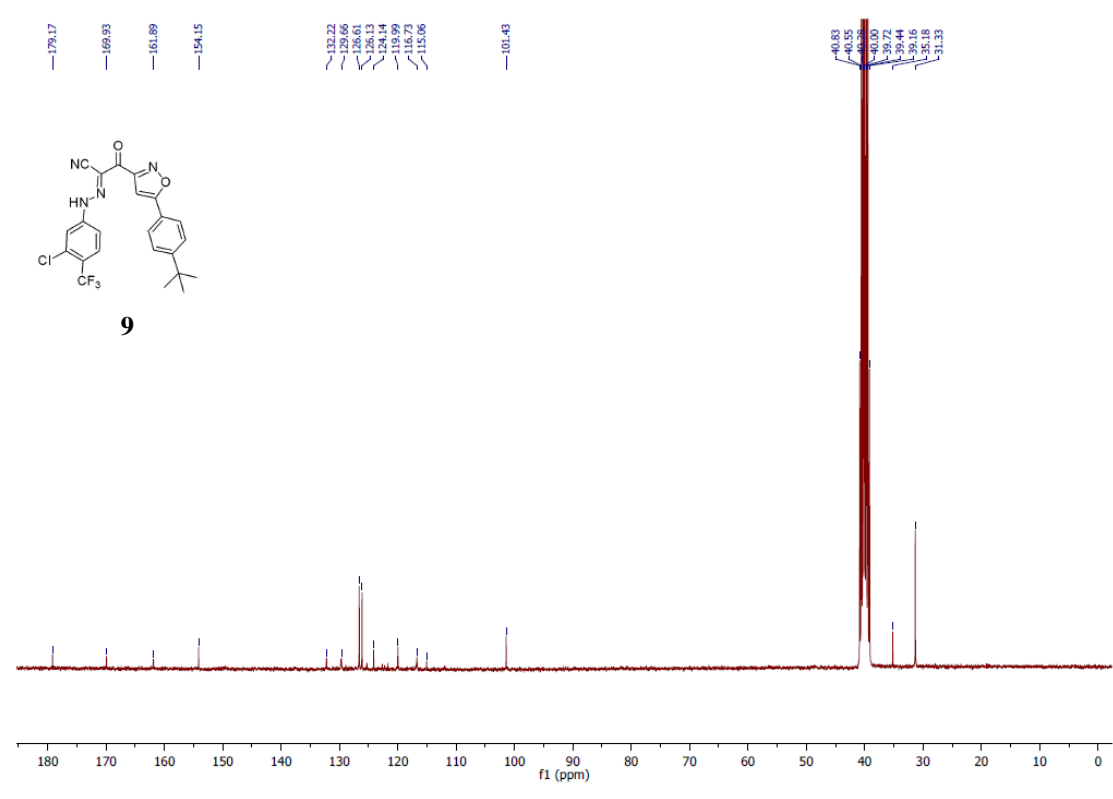



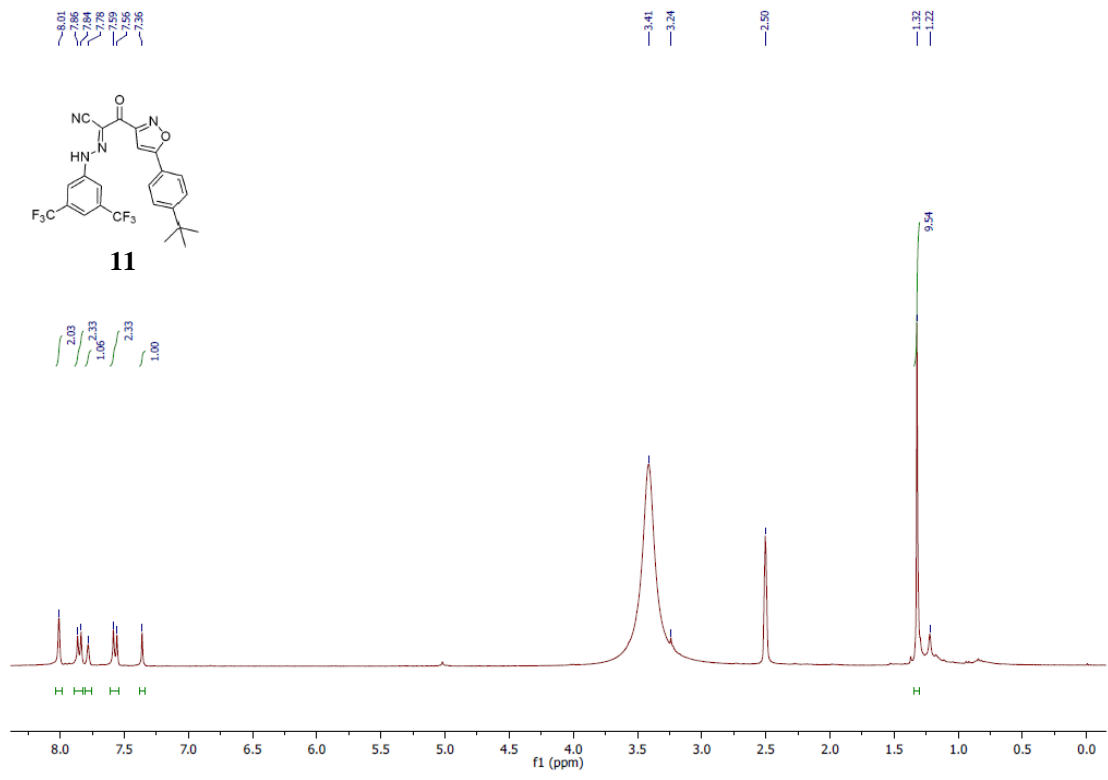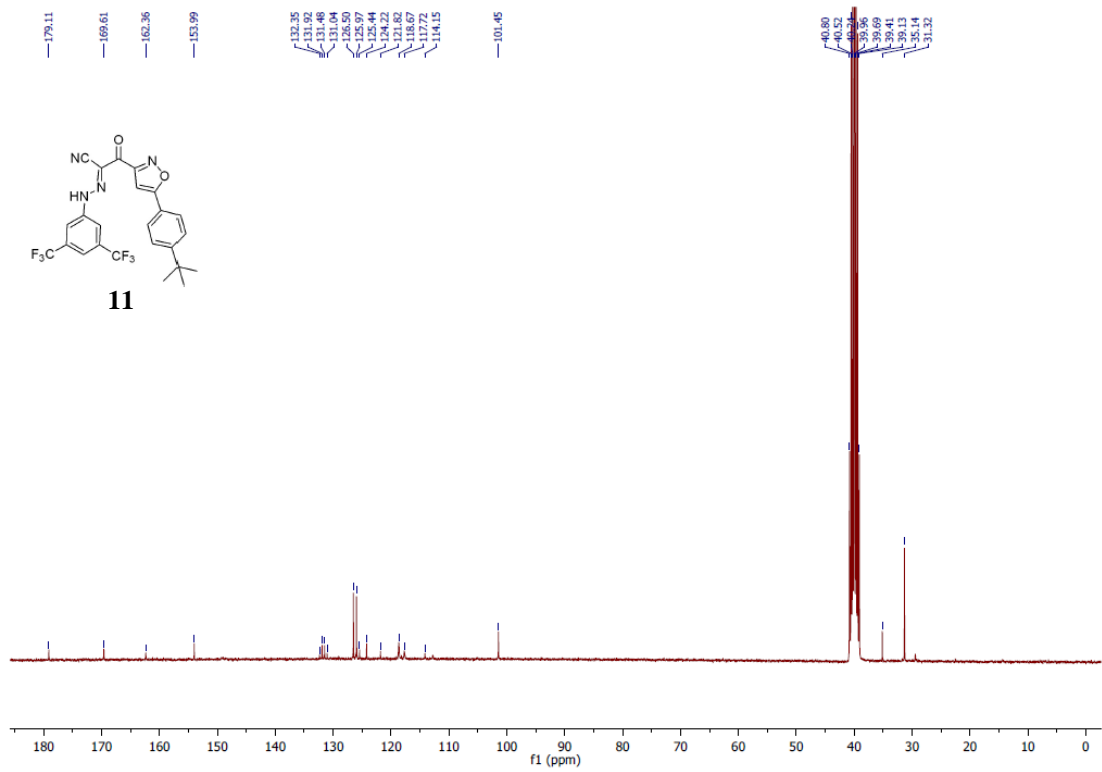

NY0402  
7.59  
7.56  
7.55  
7.55  
7.51  
7.51

3.46

2.50

0.00

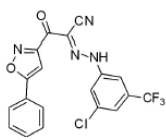

13

3.14  
2.06  
2.04  
1.07  
1.00

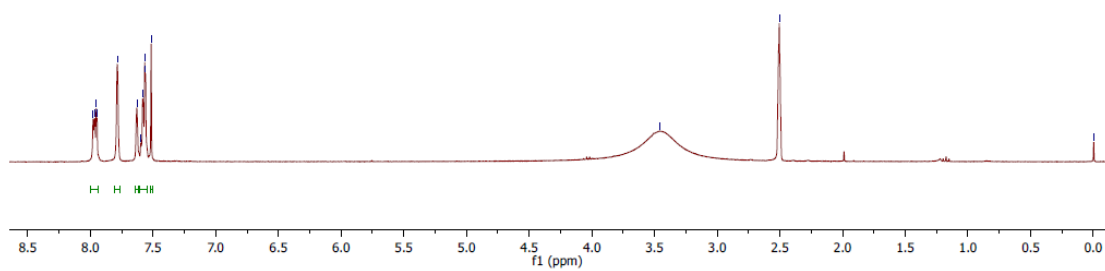

NY0402\_C  
179.11  
170.04  
161.55

145.82  
135.49  
132.37  
131.93  
131.38  
129.80  
128.23  
125.27  
121.65  
121.00  
119.72  
113.00  
111.19  
102.05

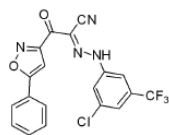

13

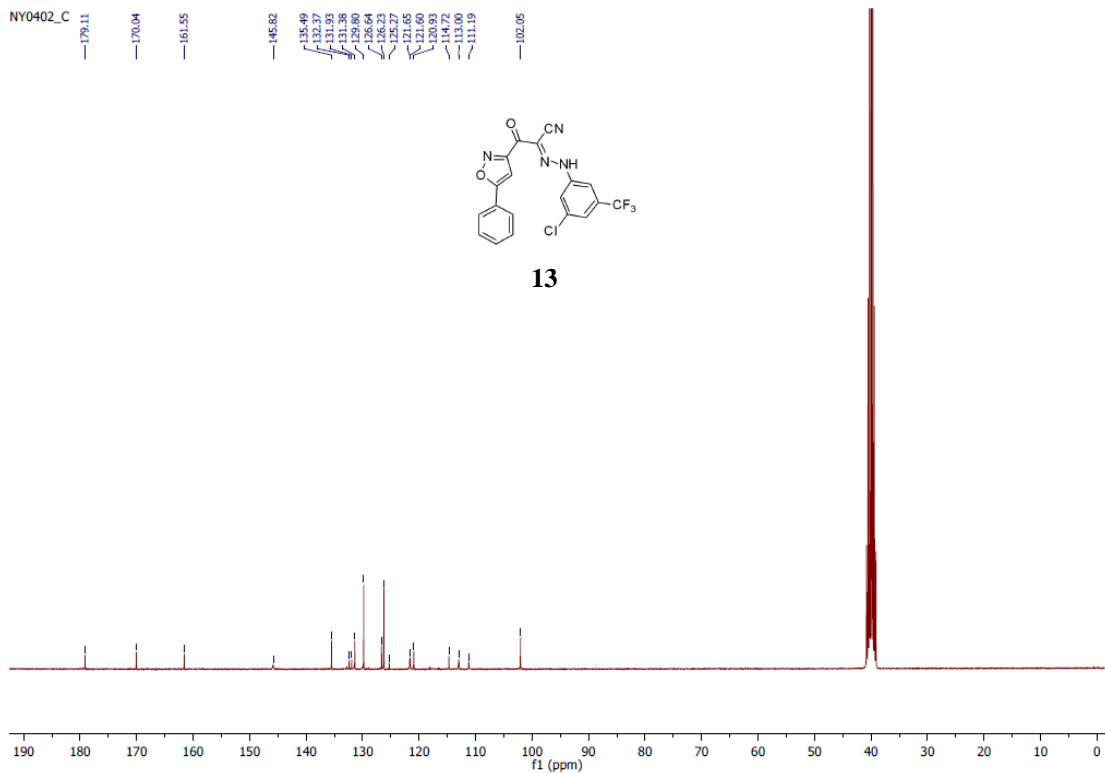

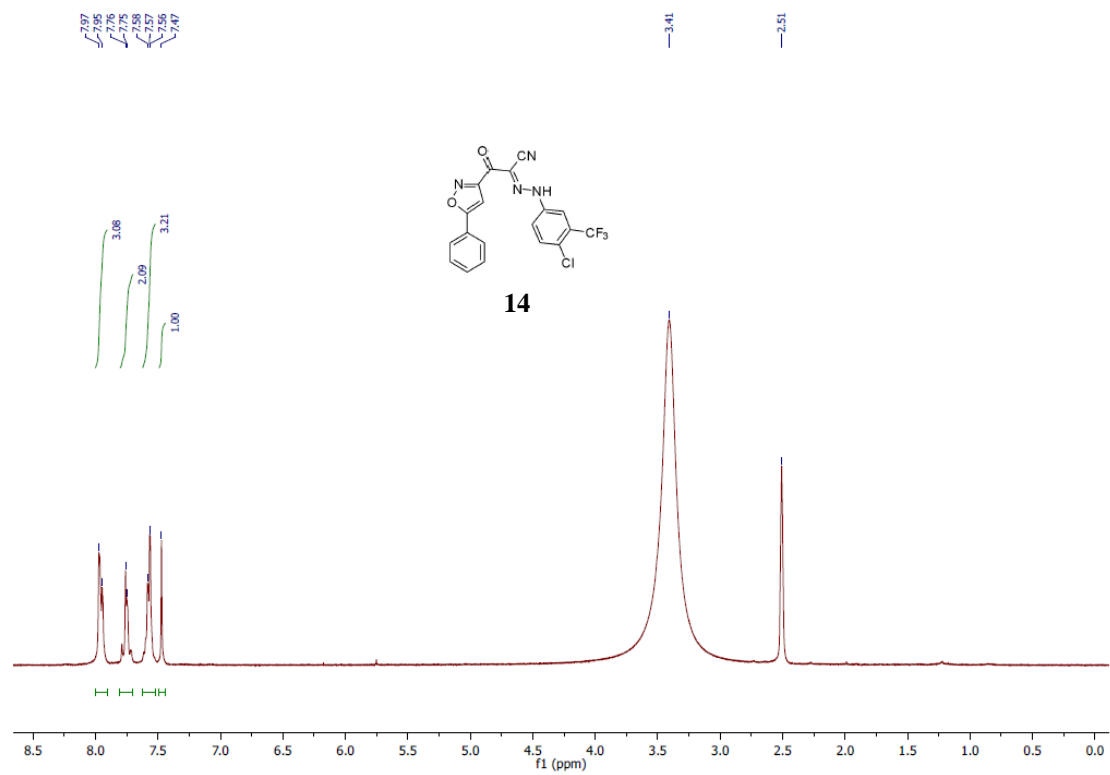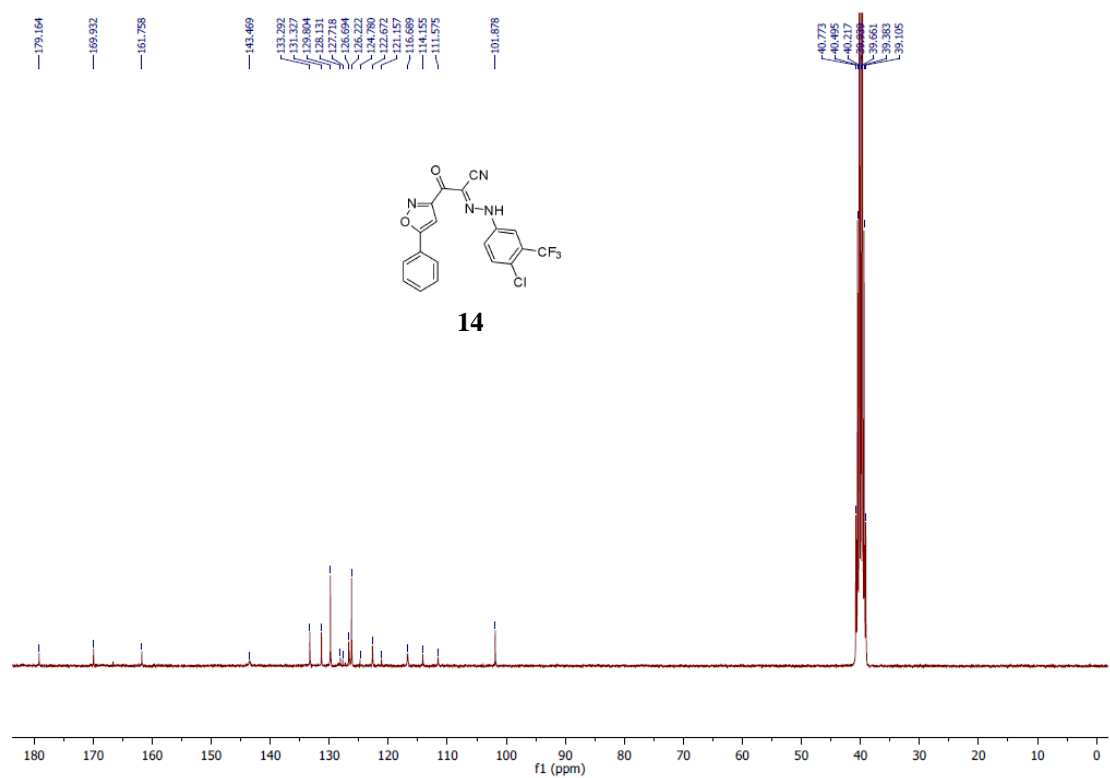



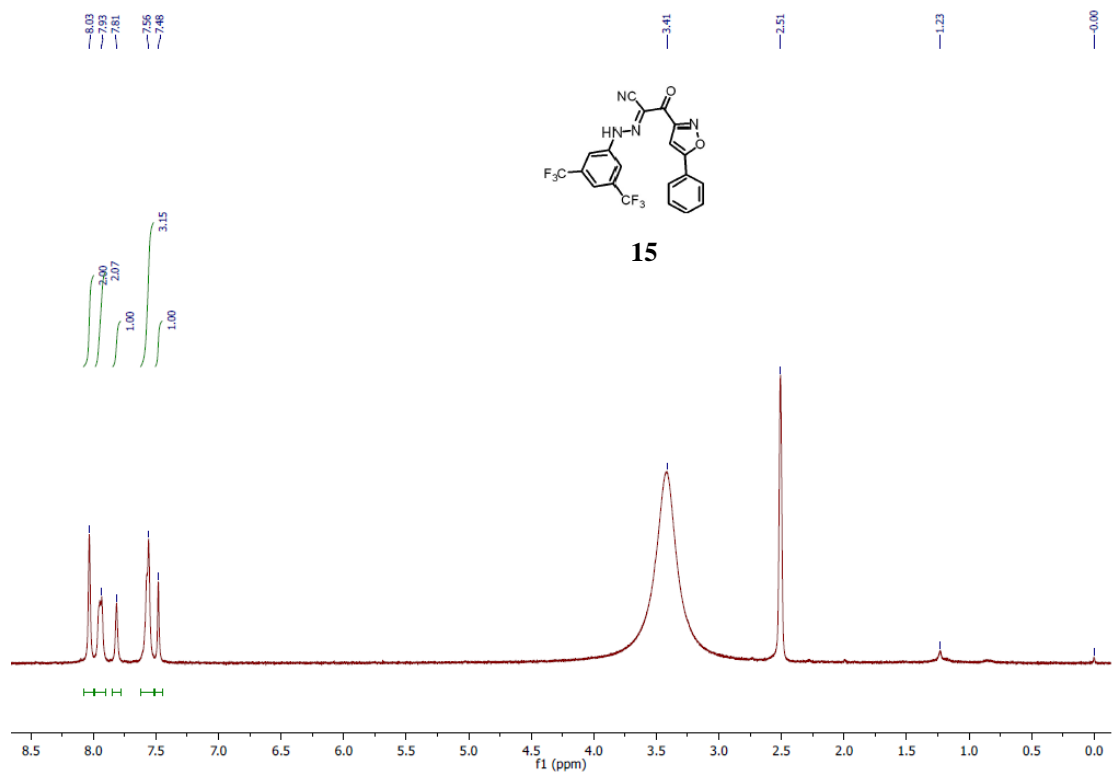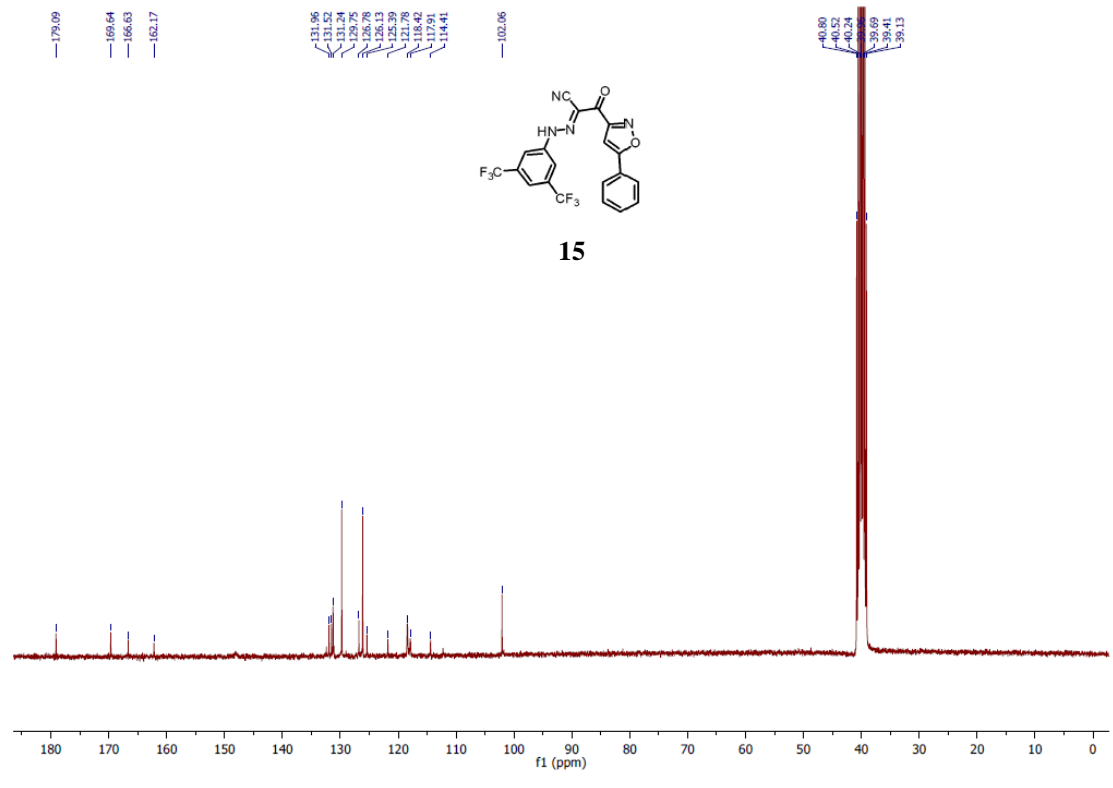

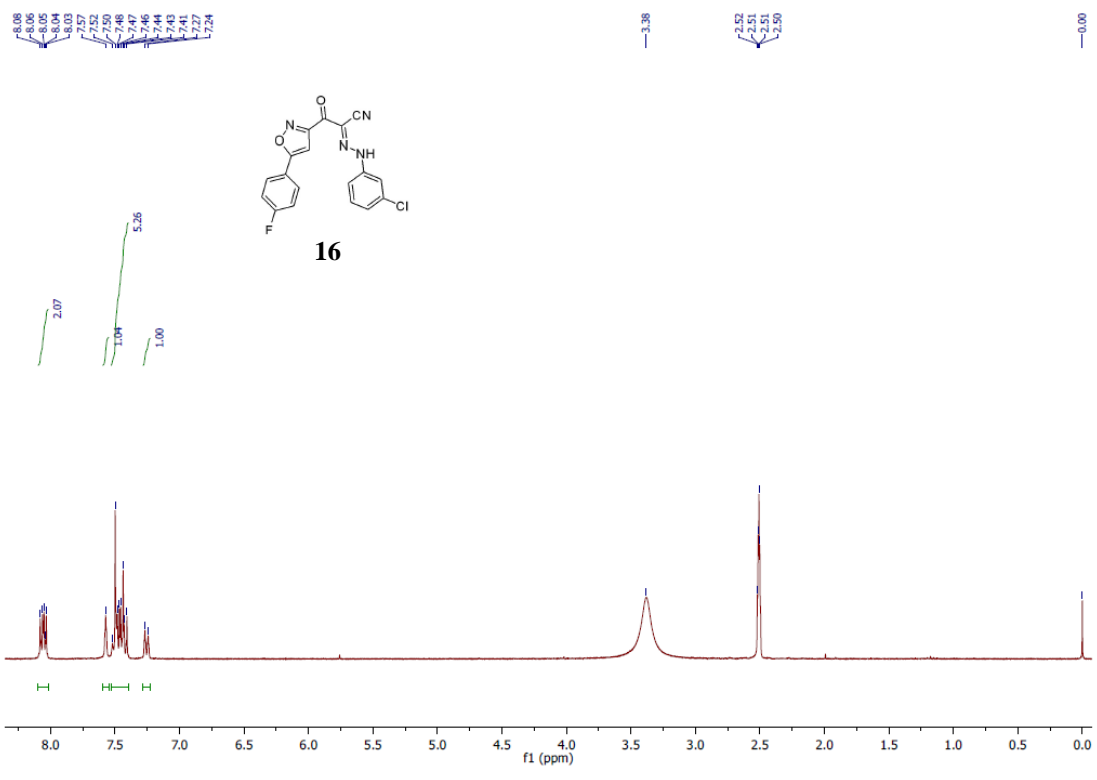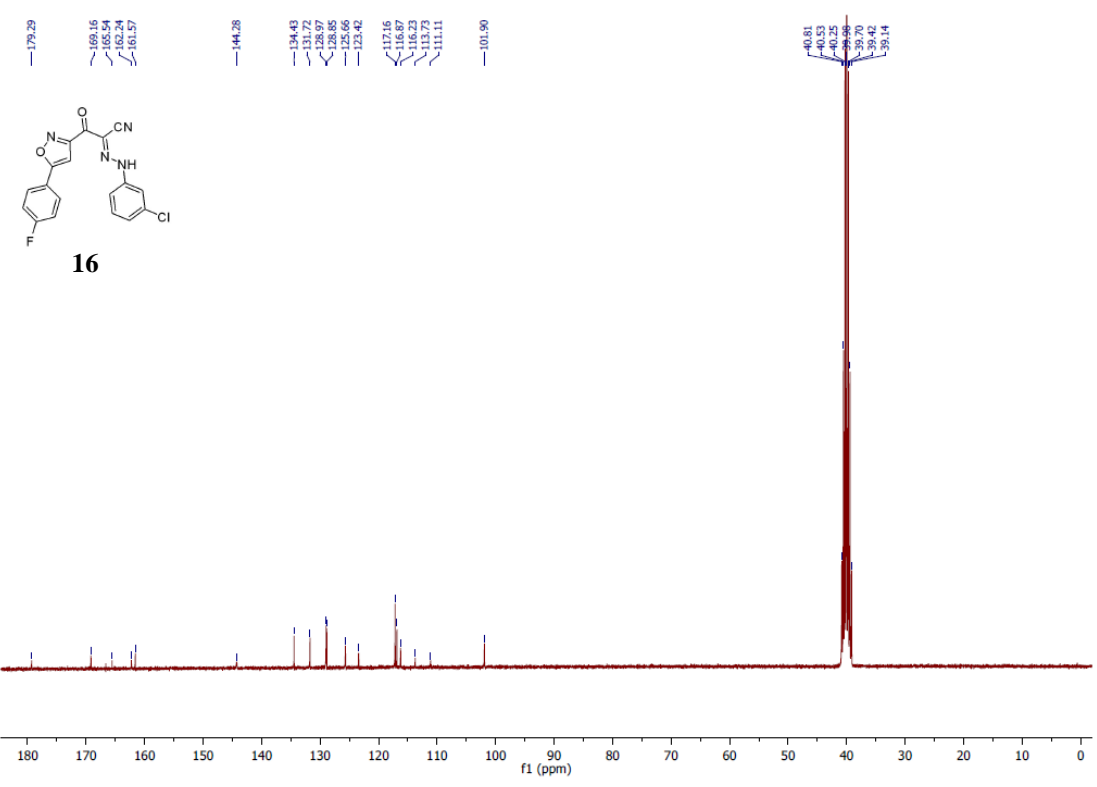

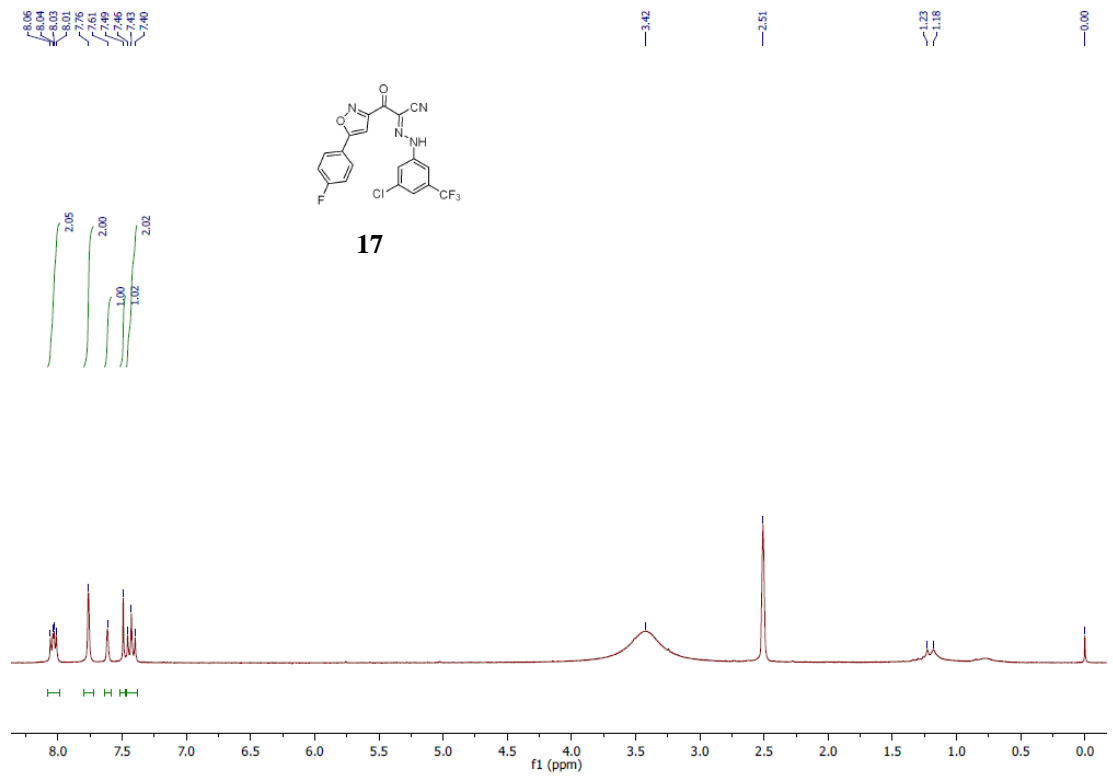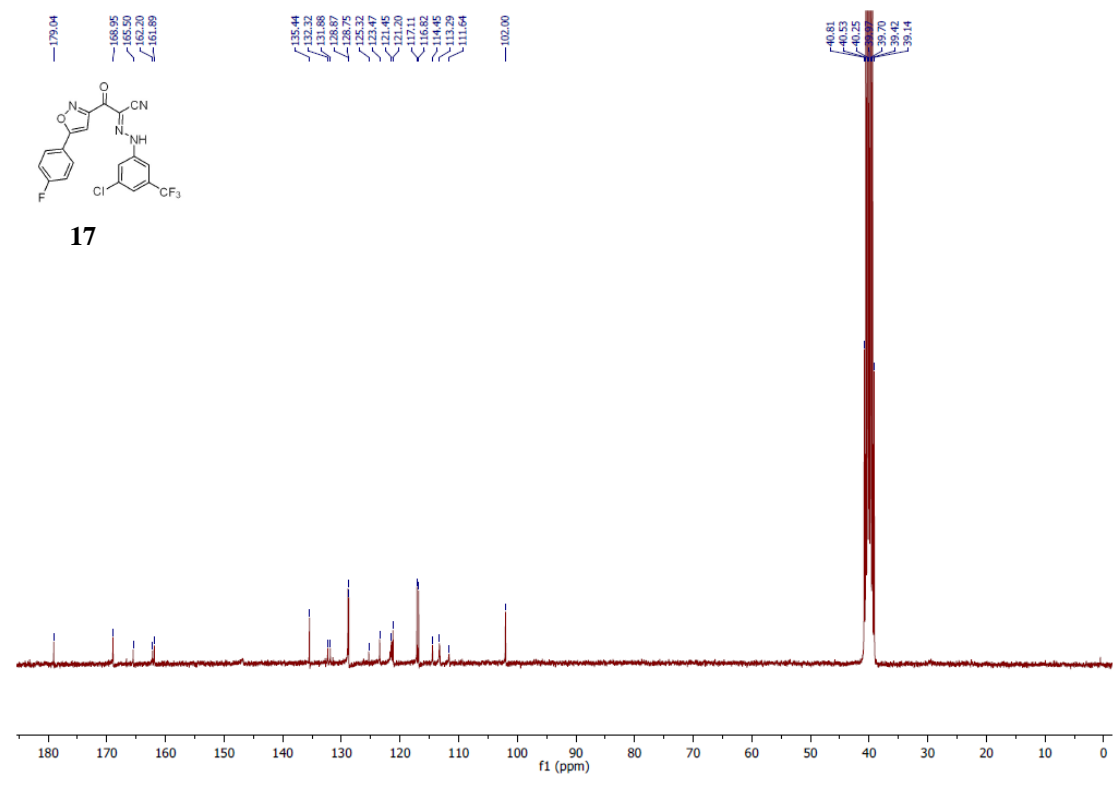

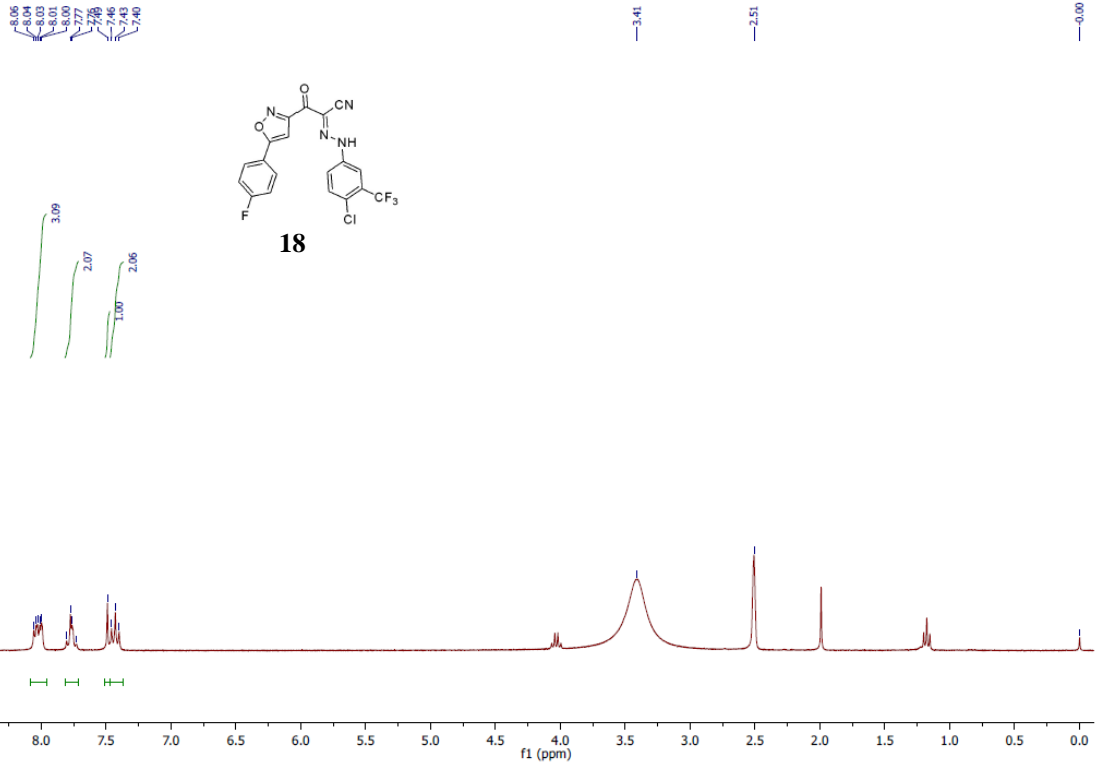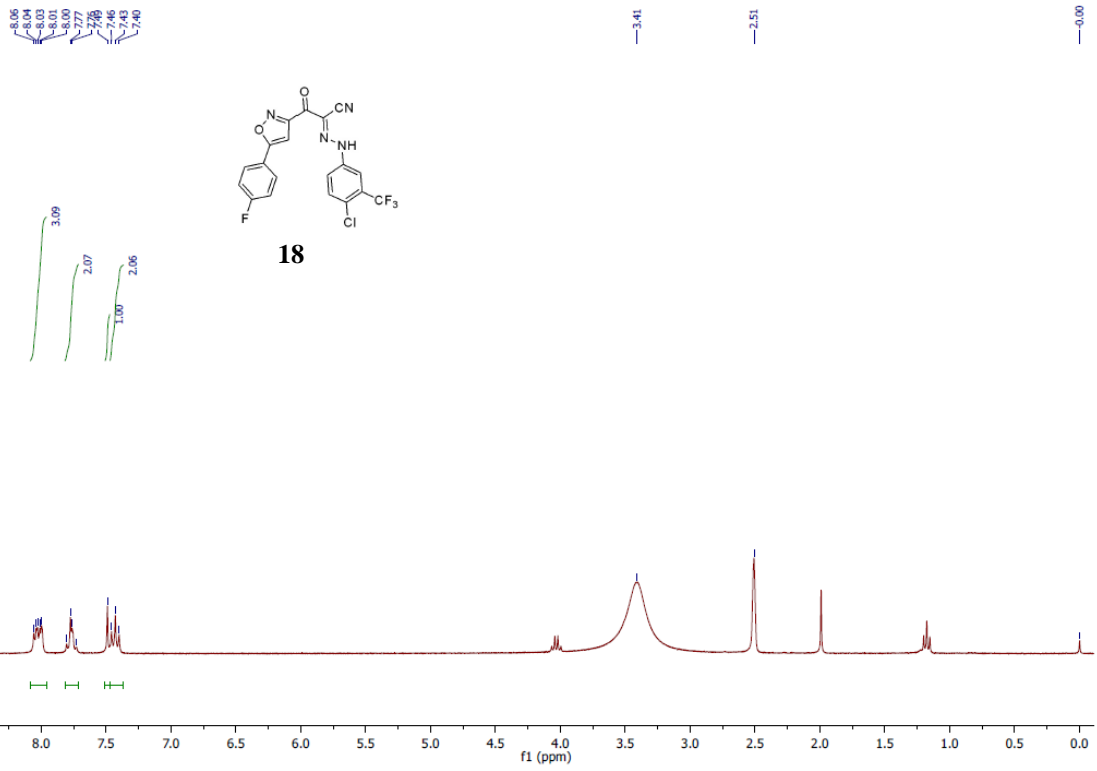

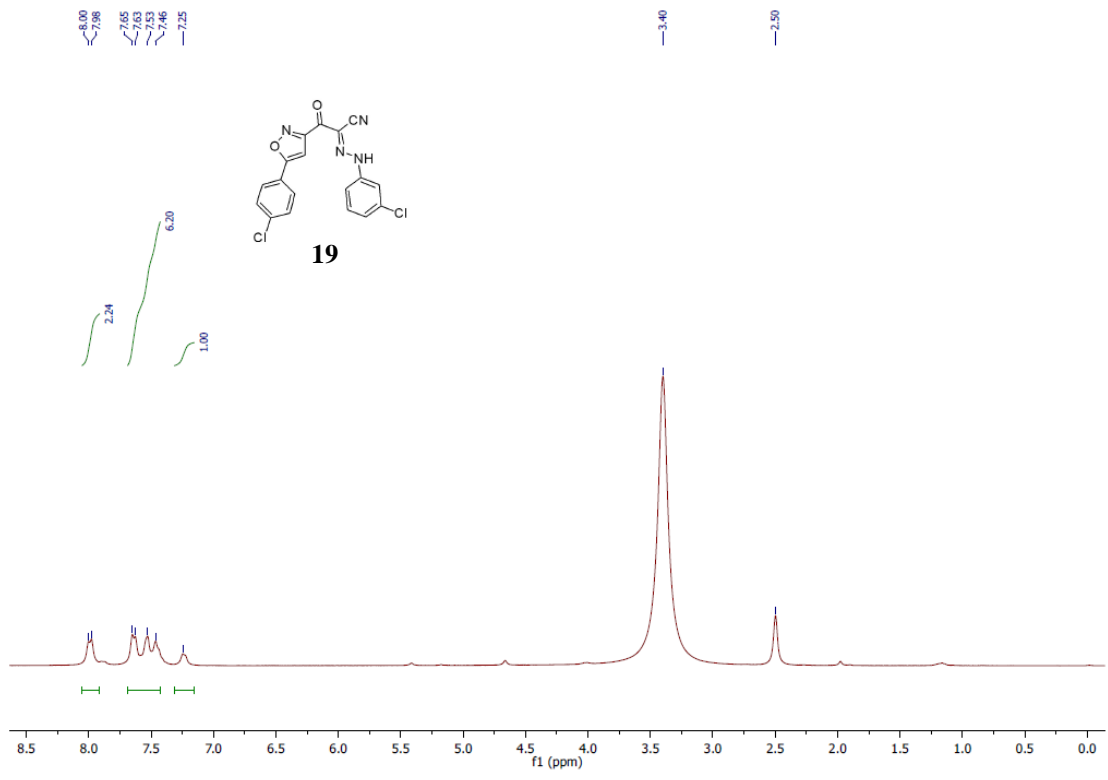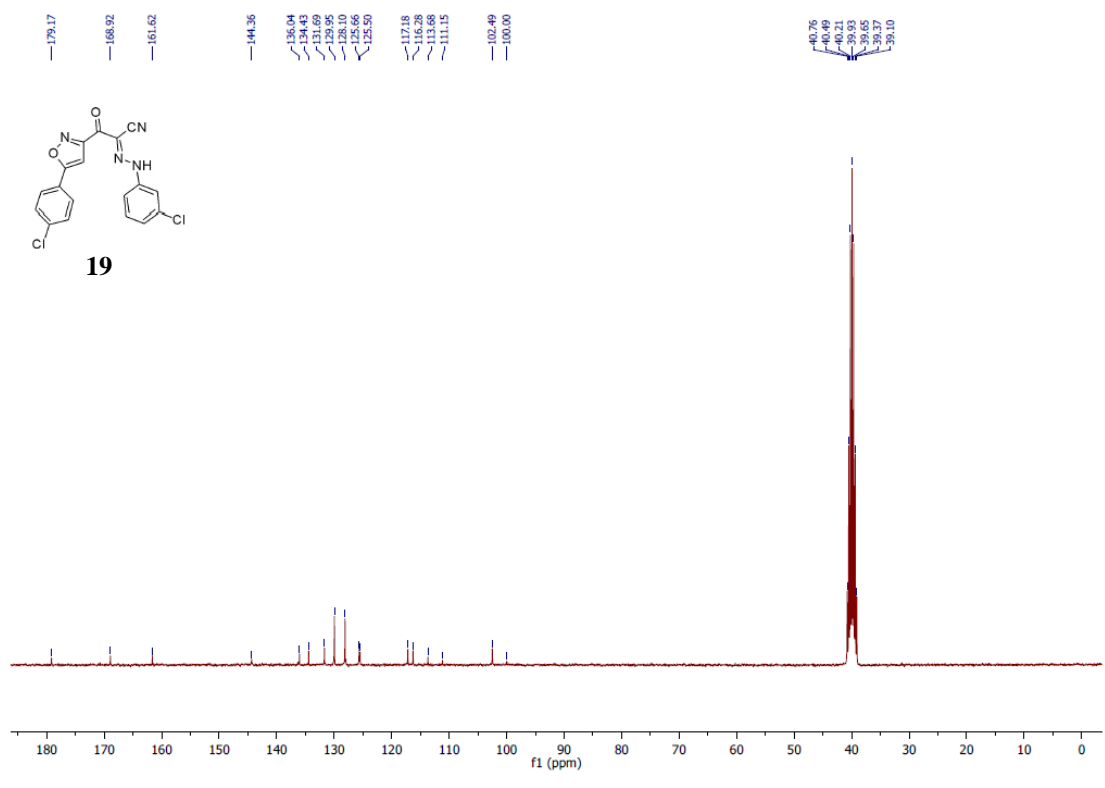

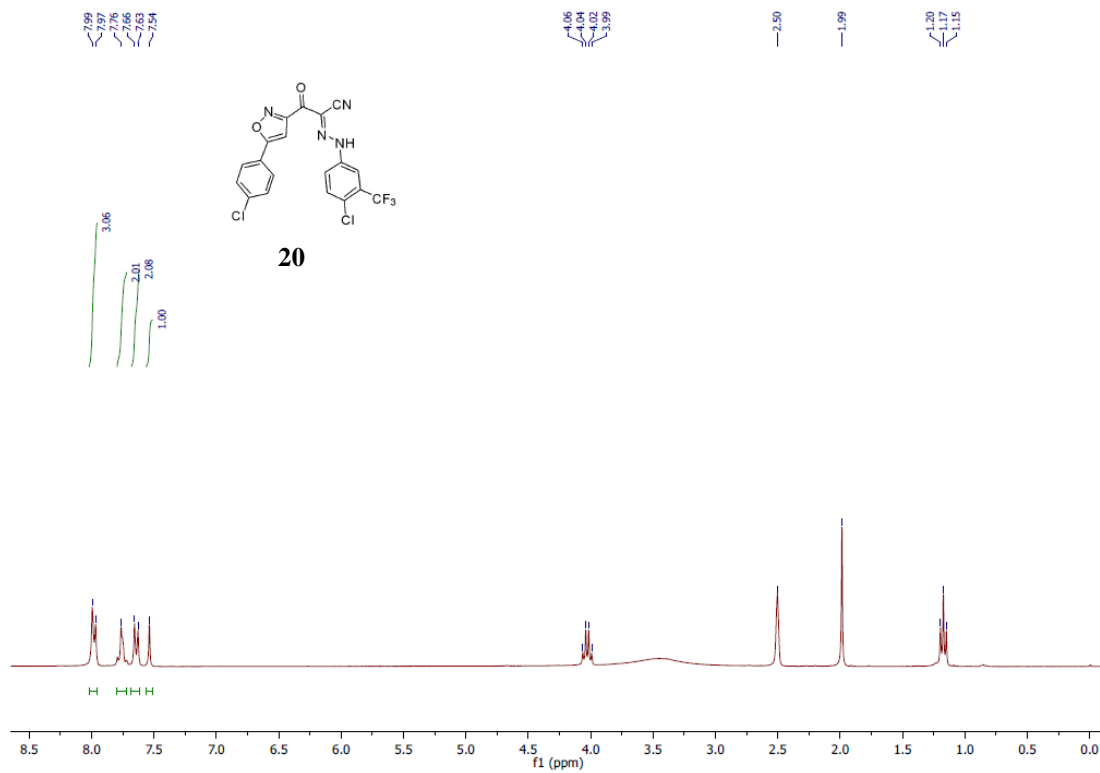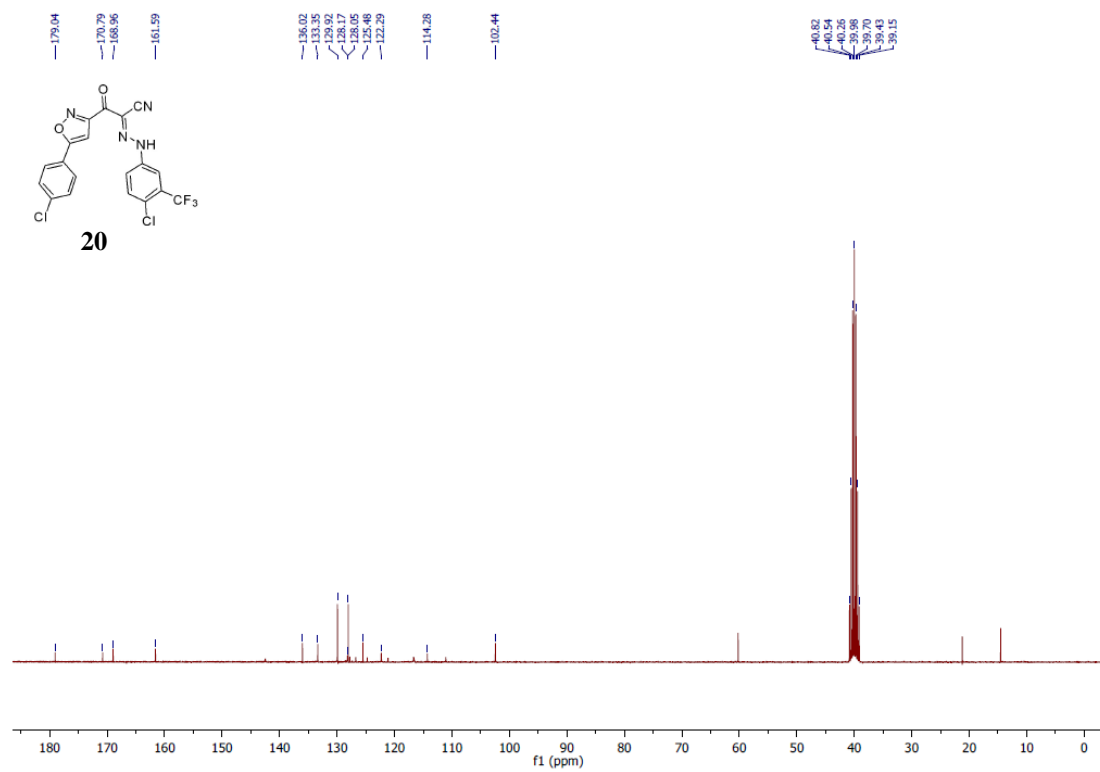

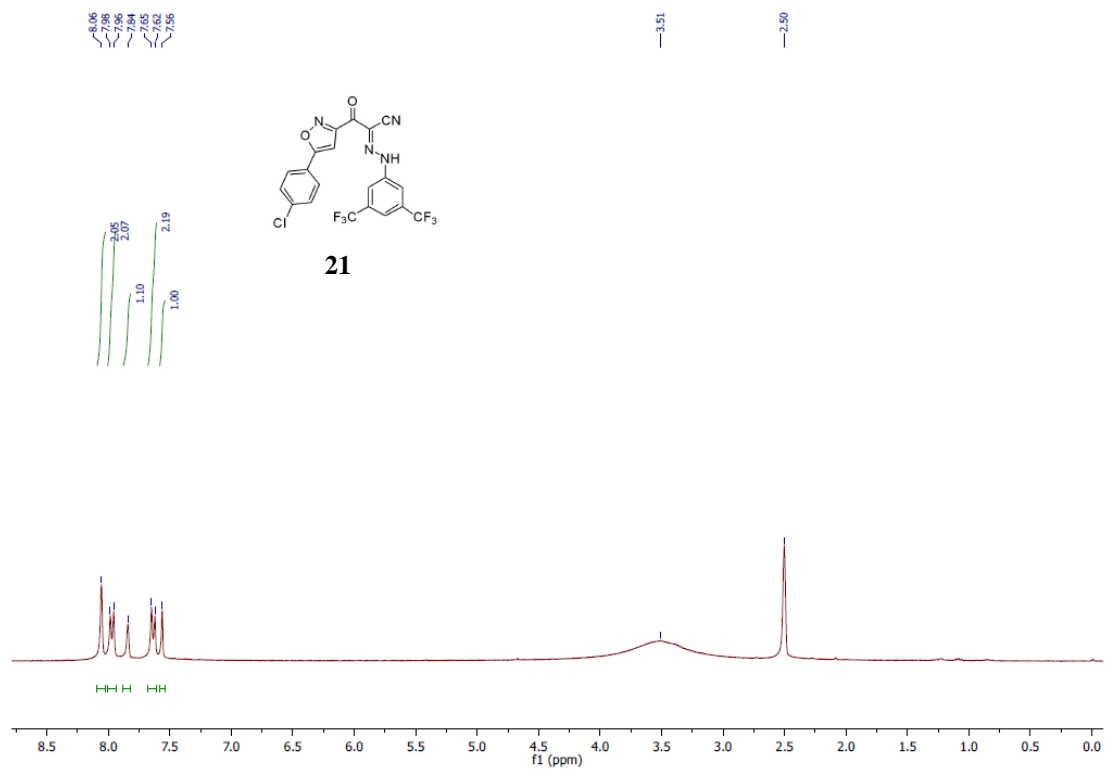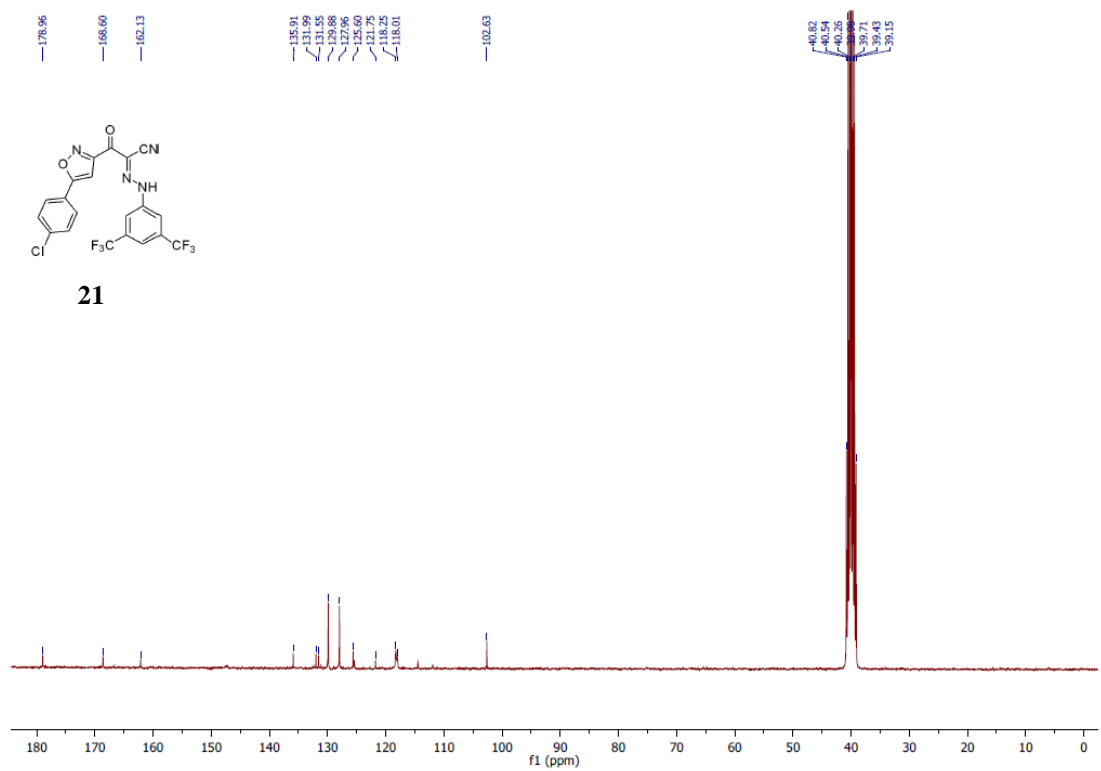

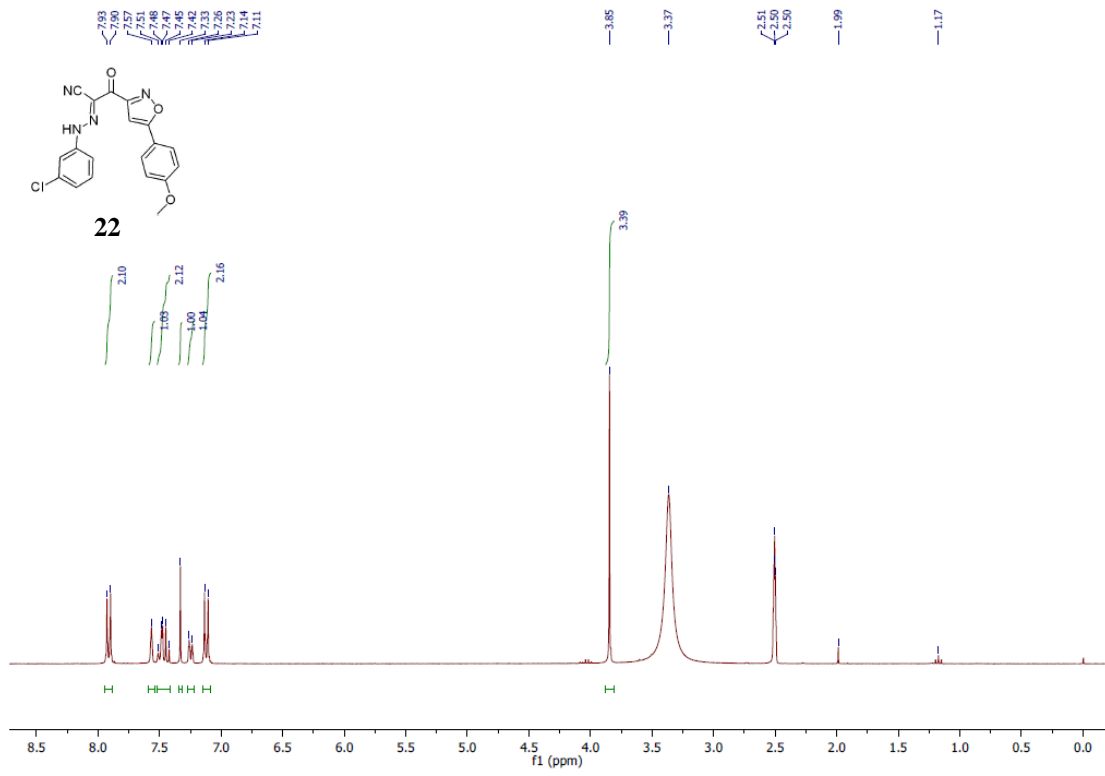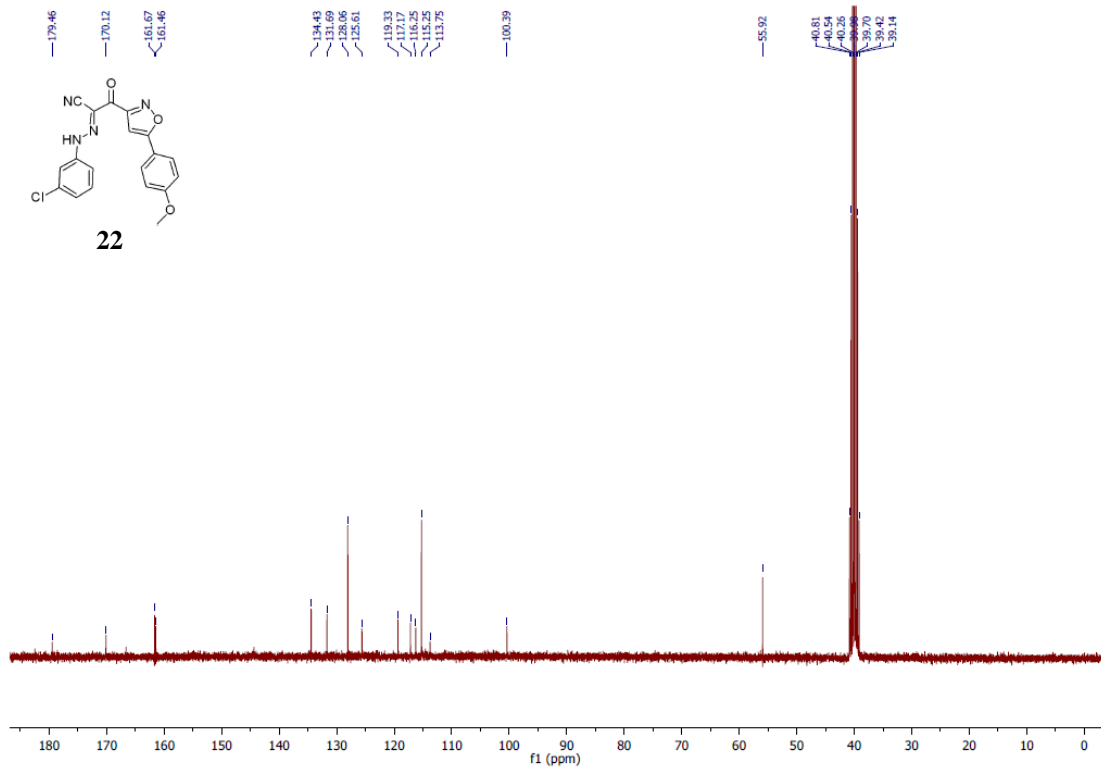



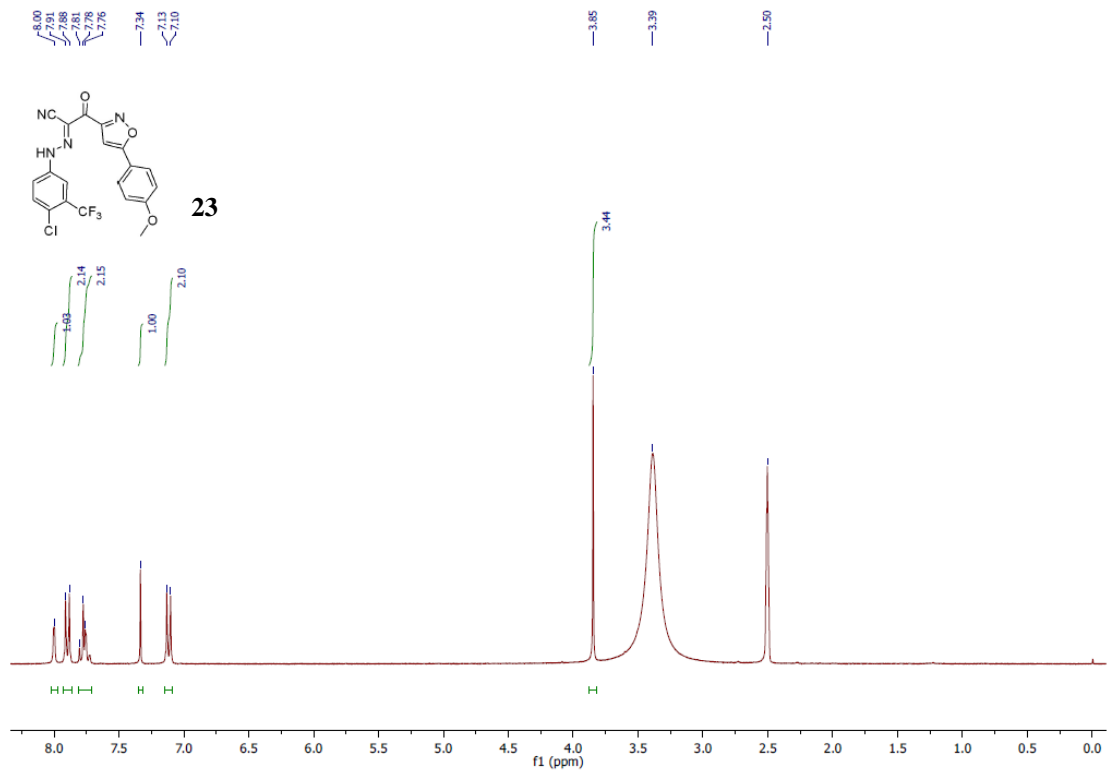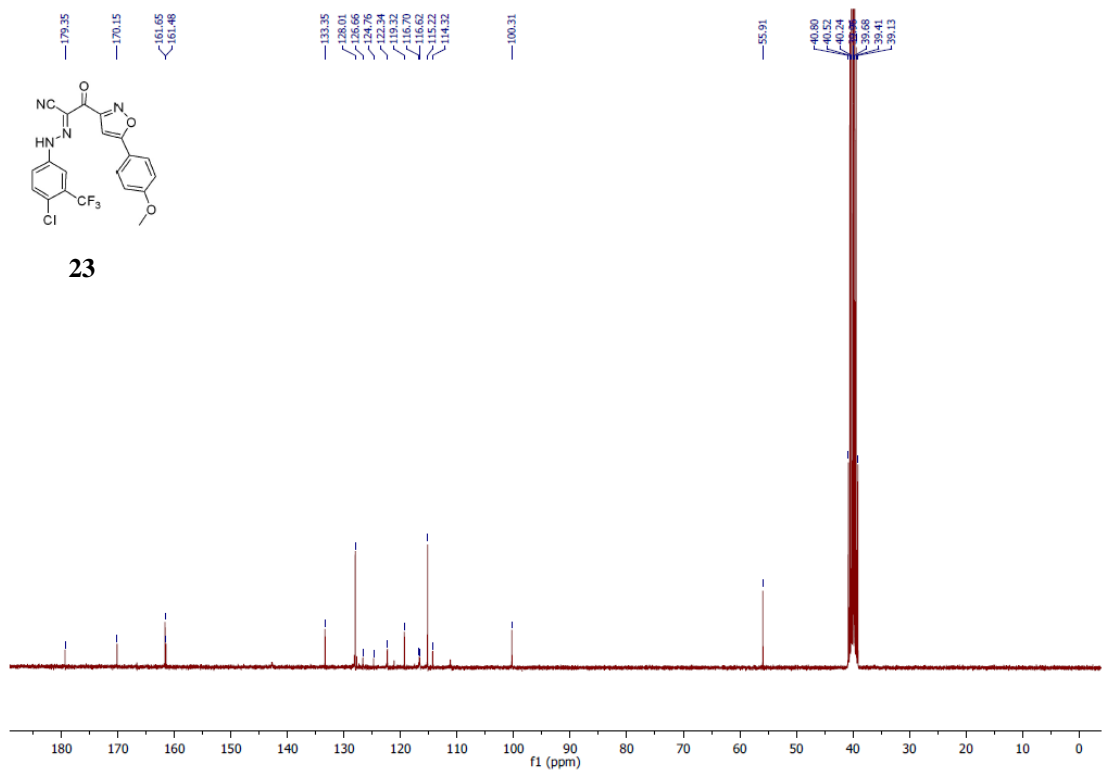

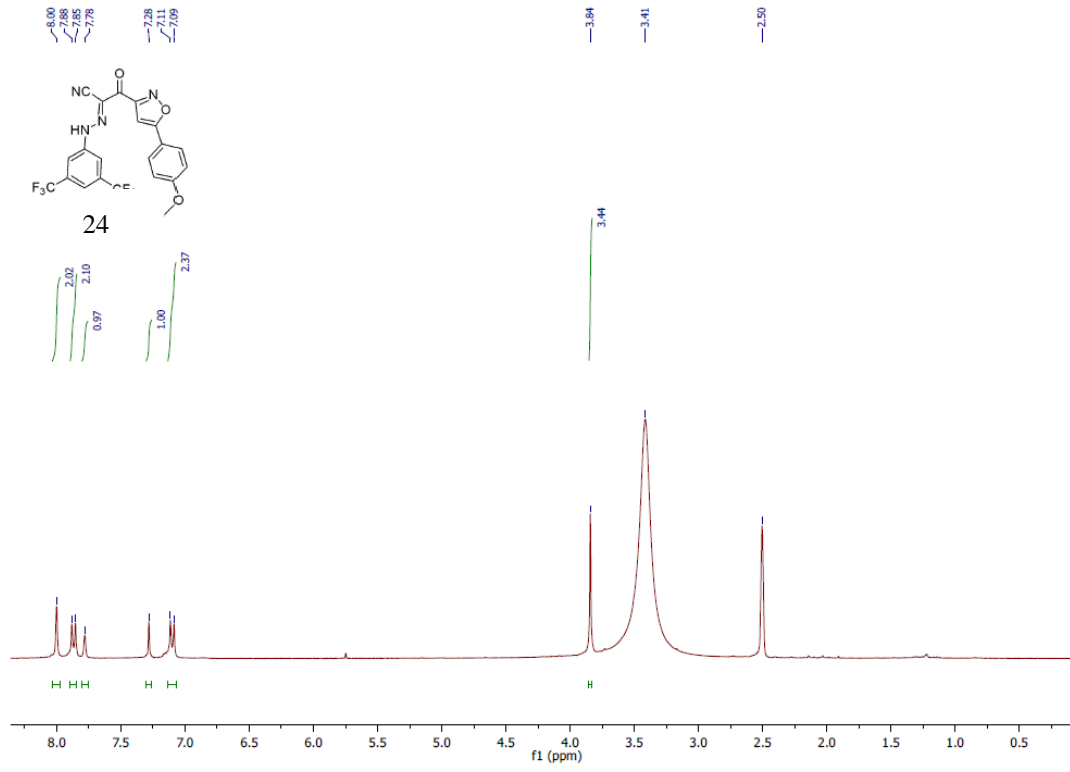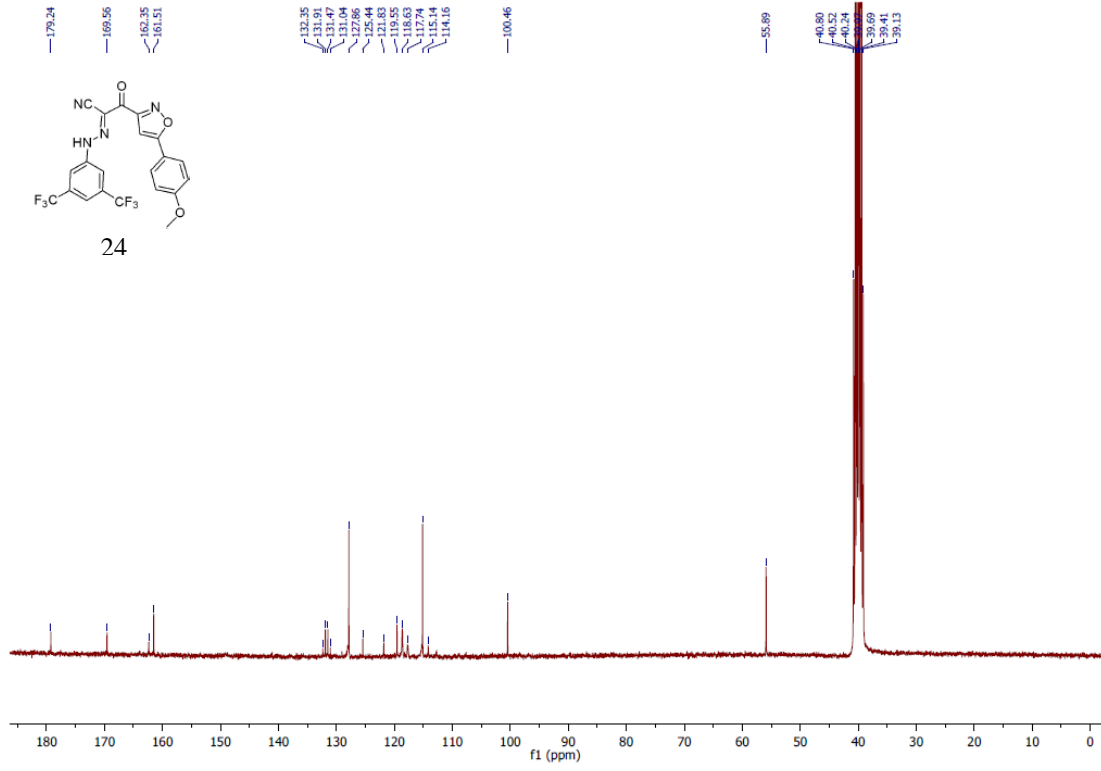

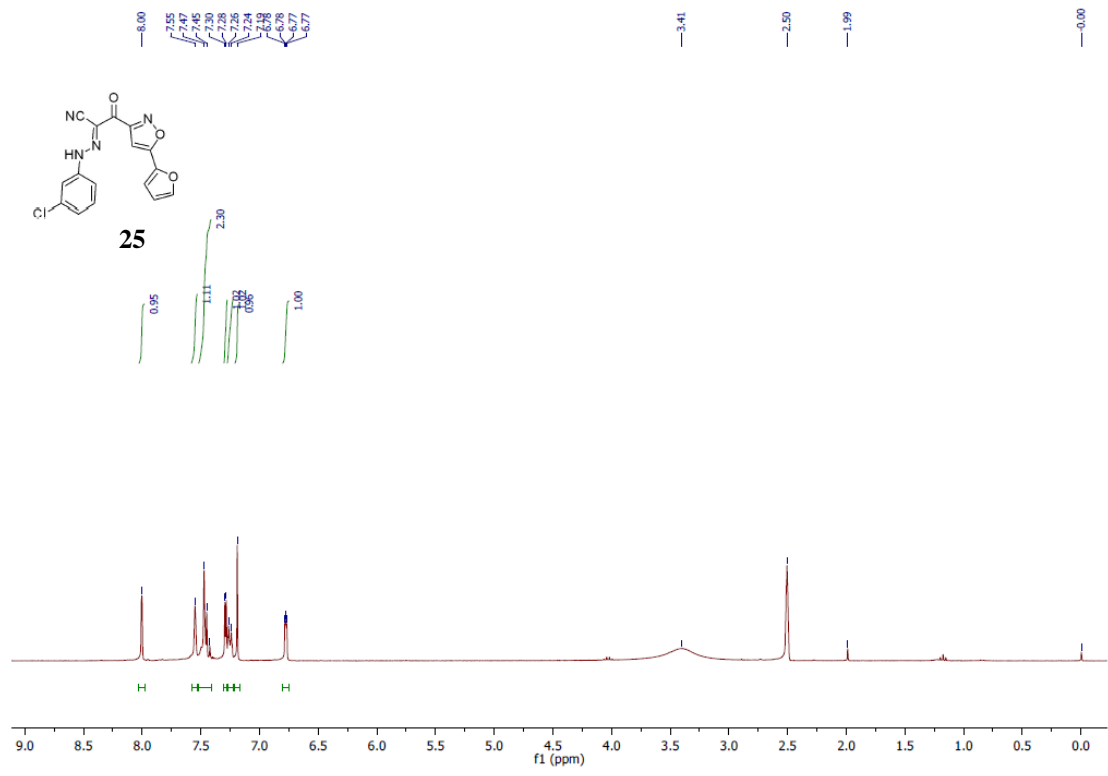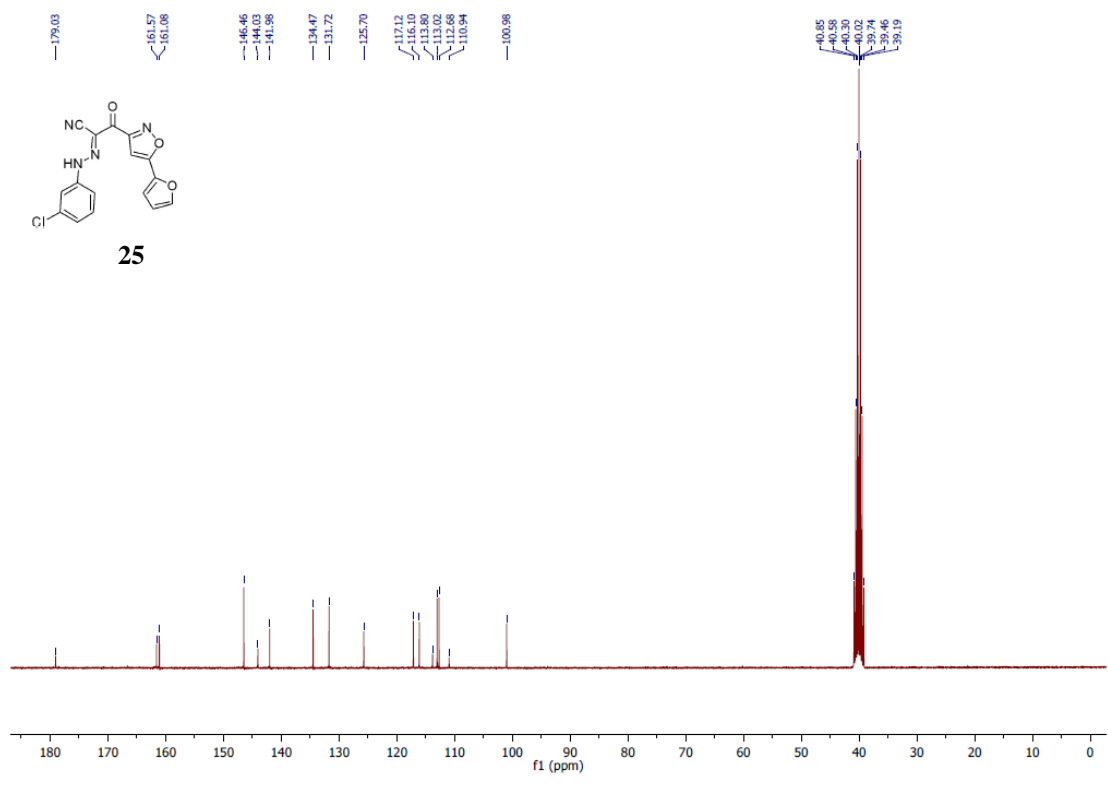

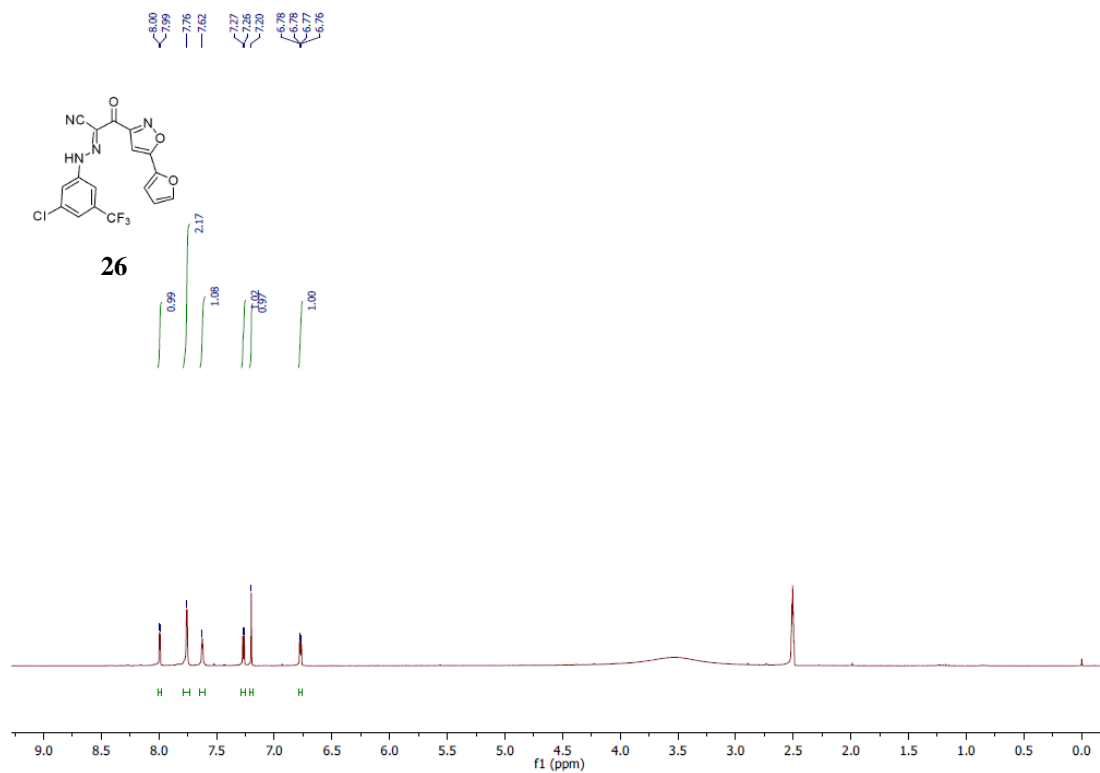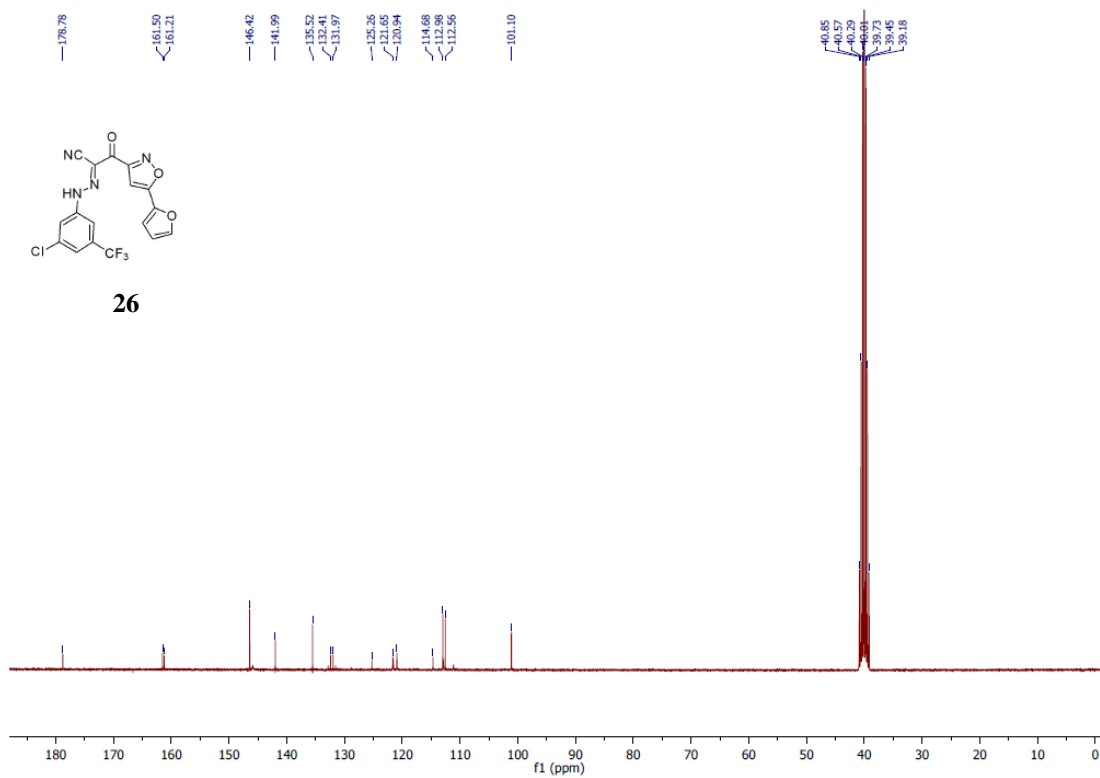

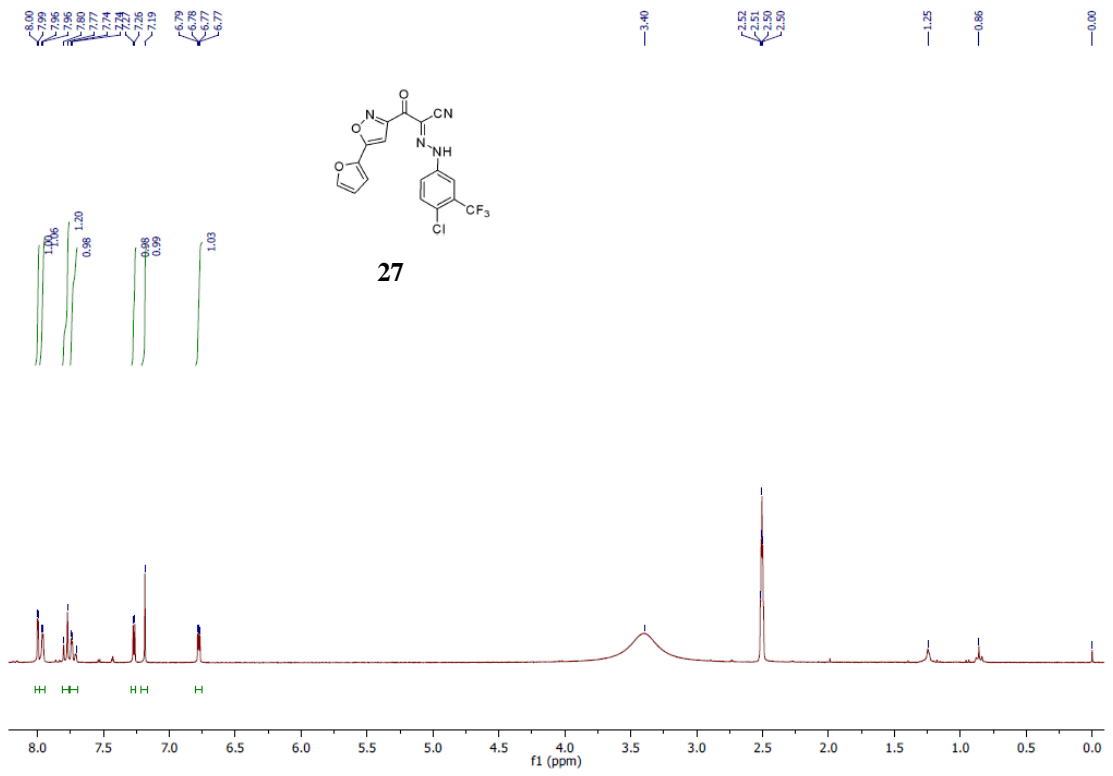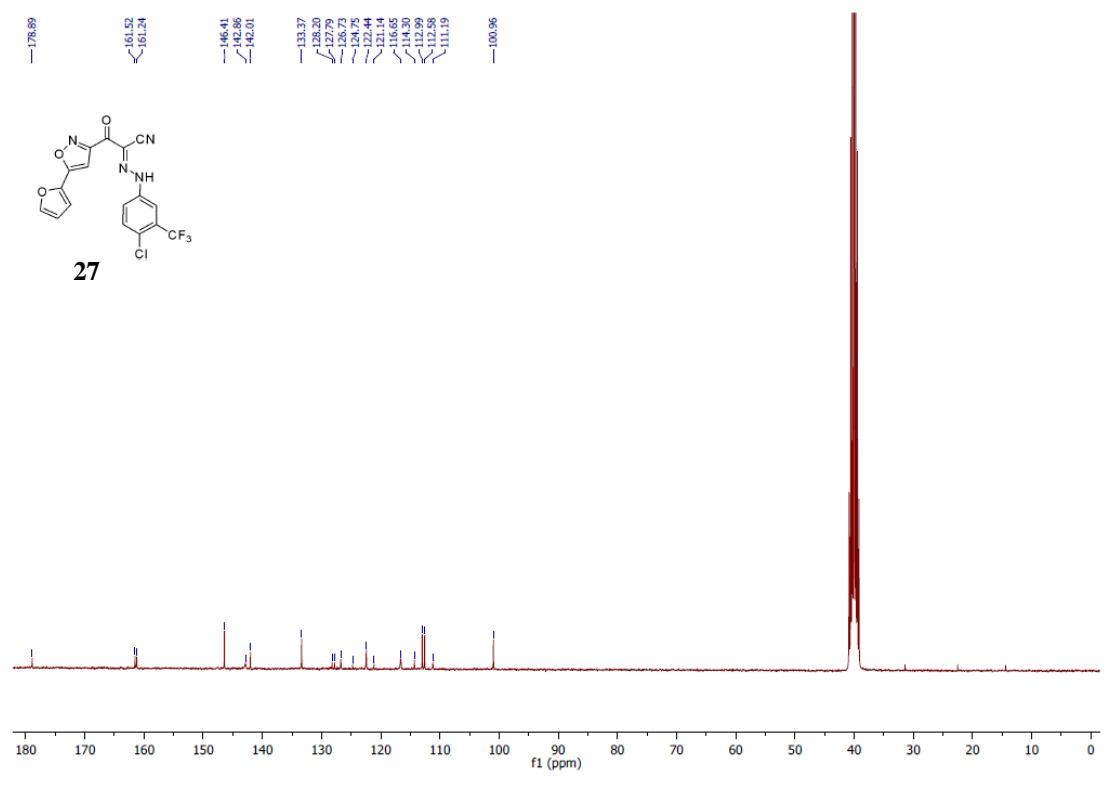



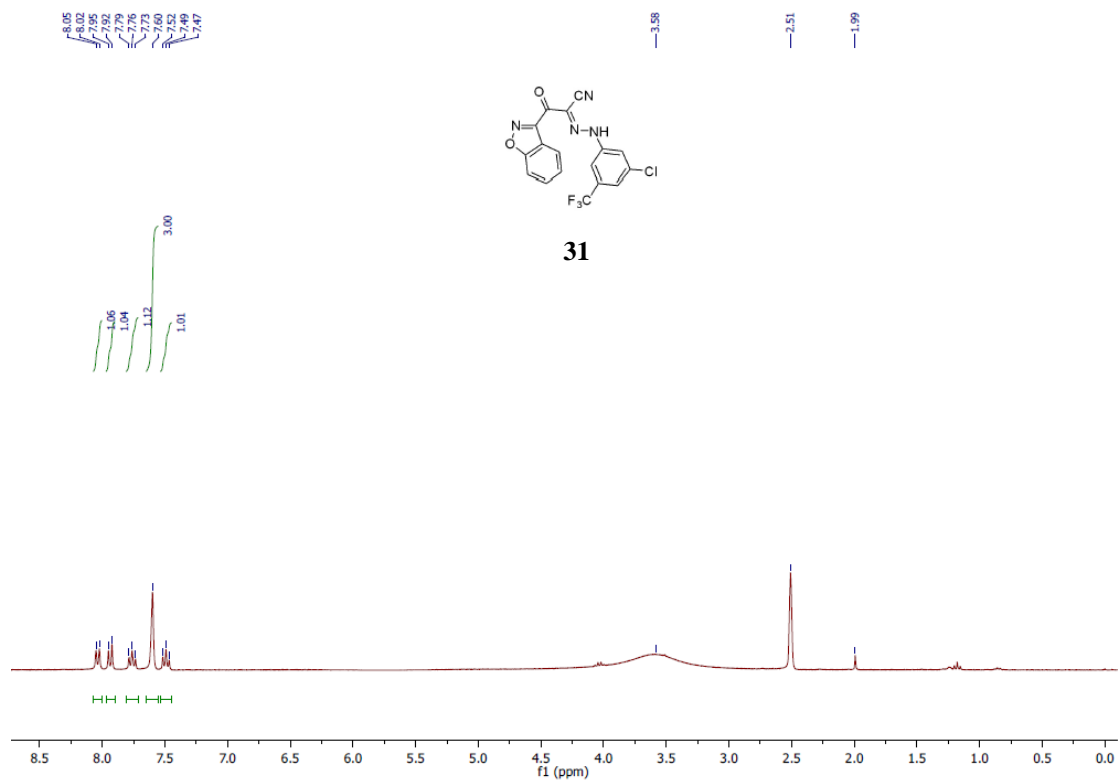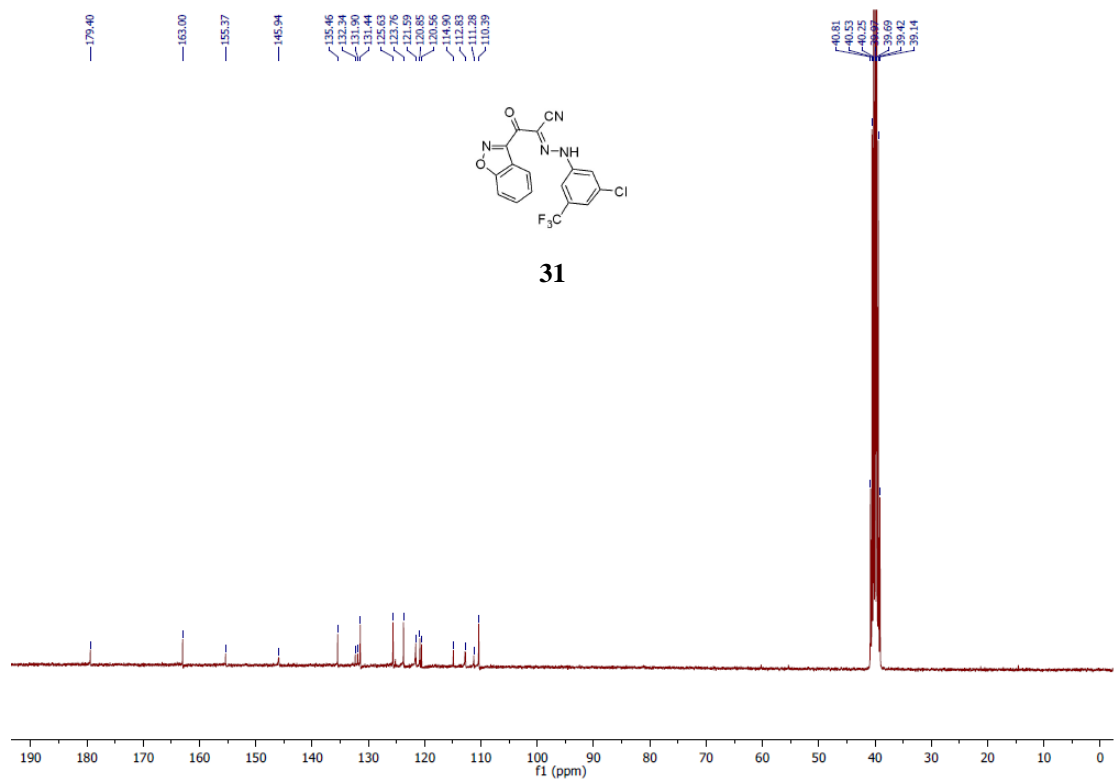

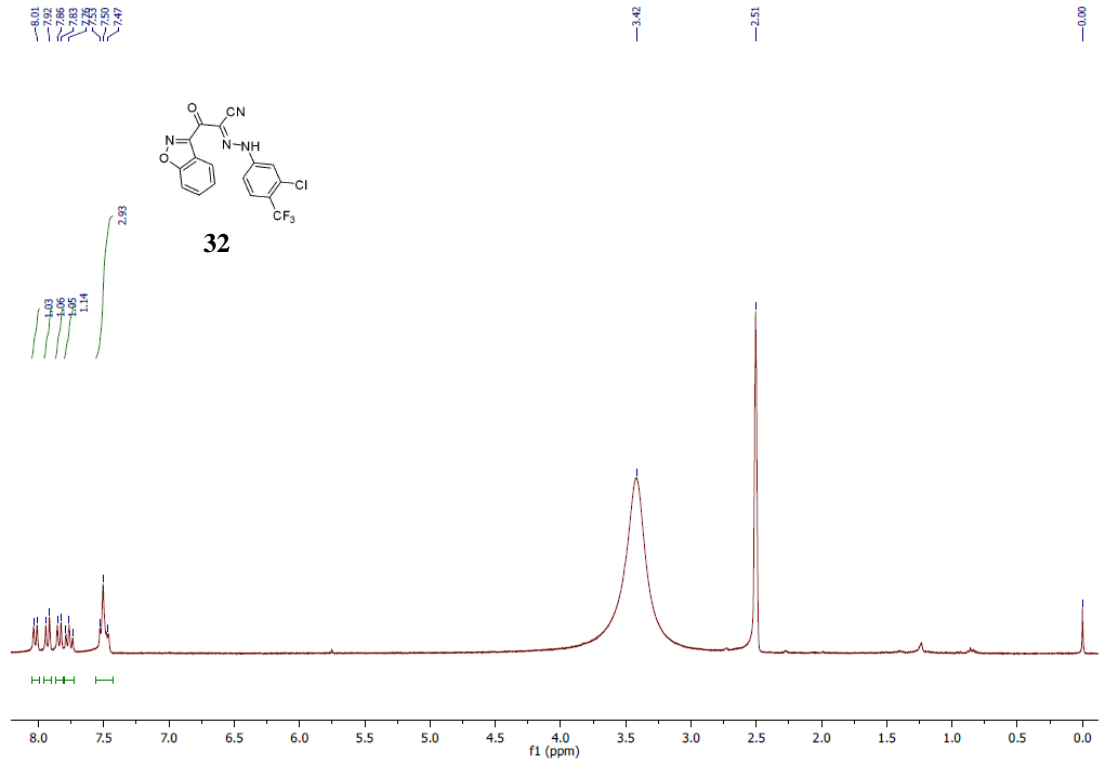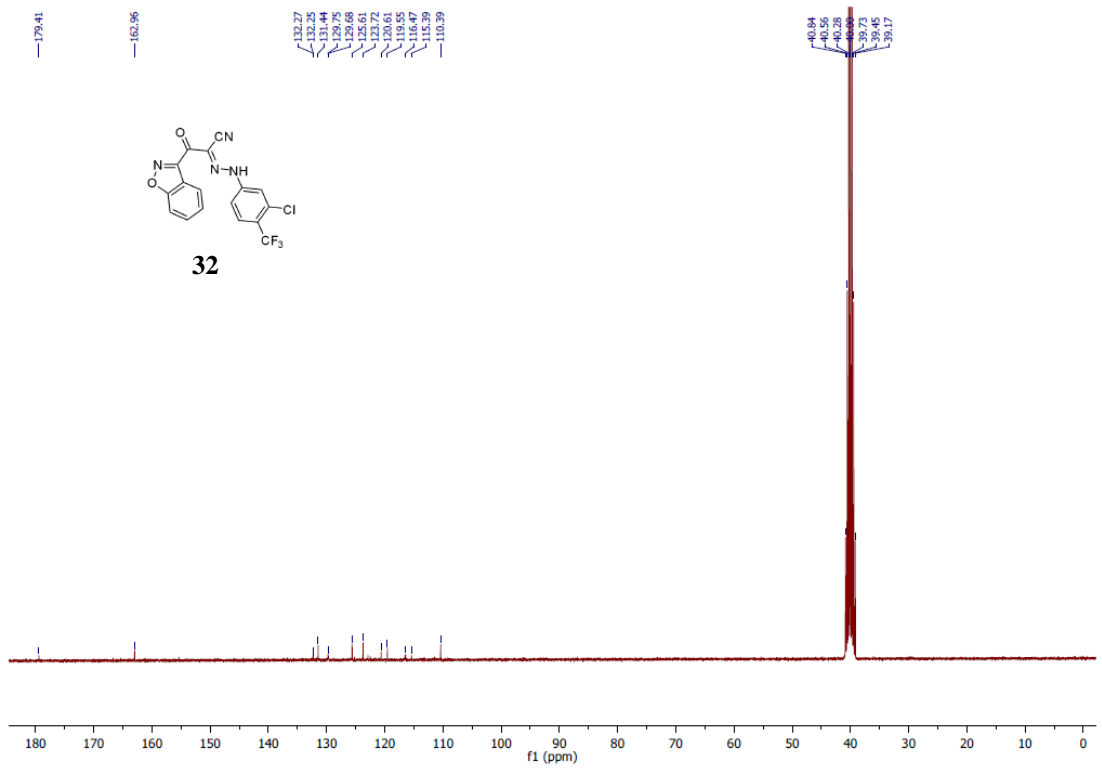



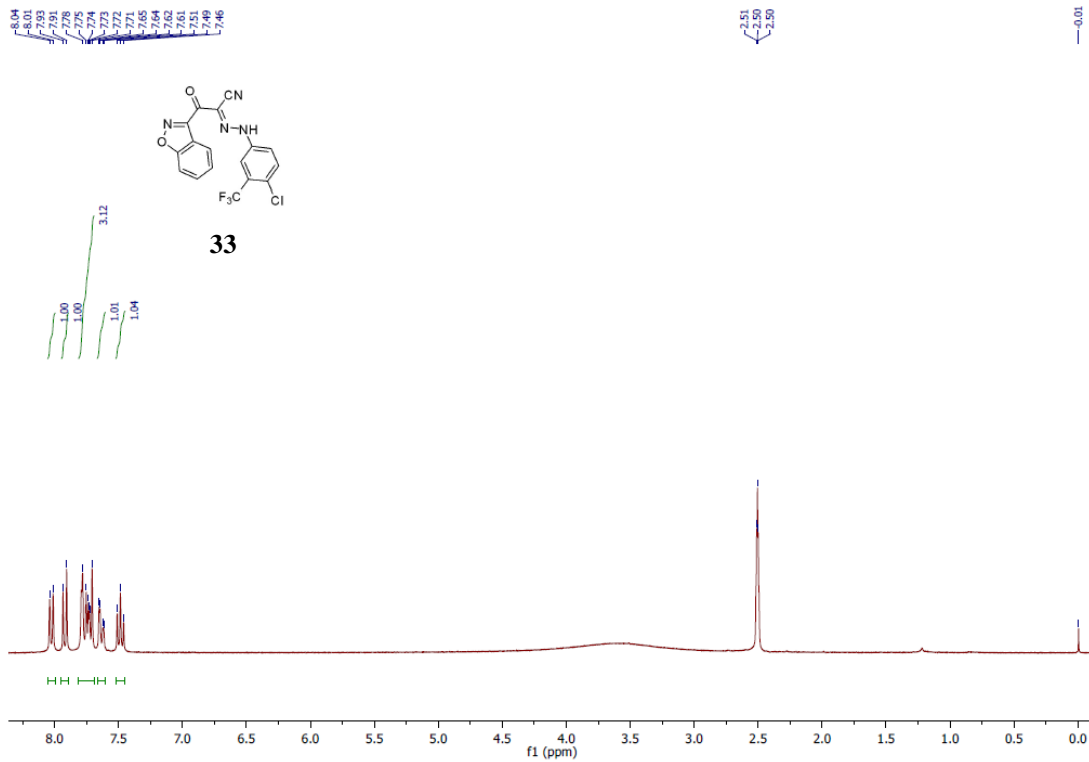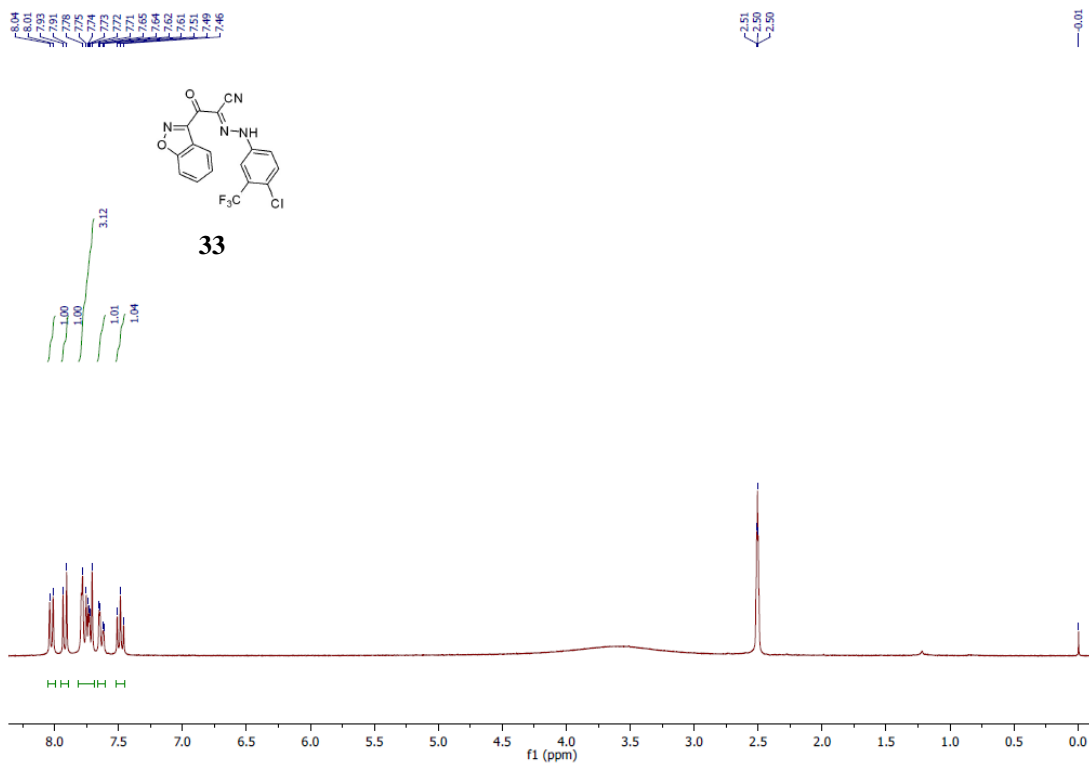

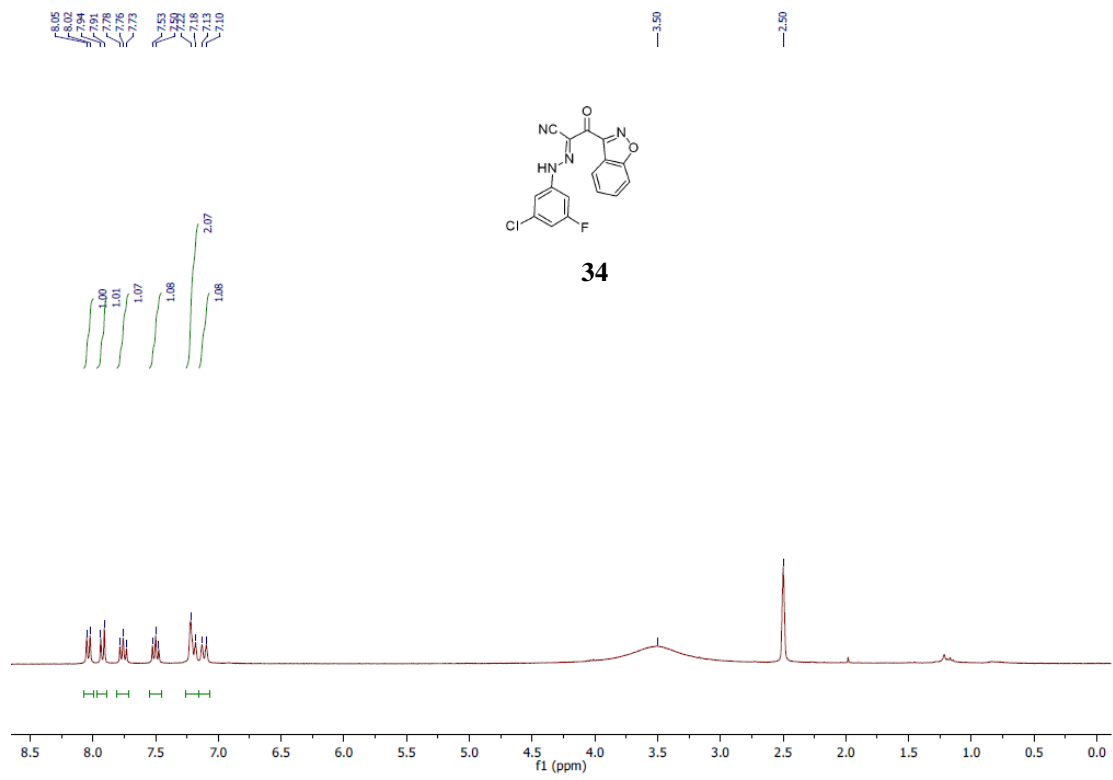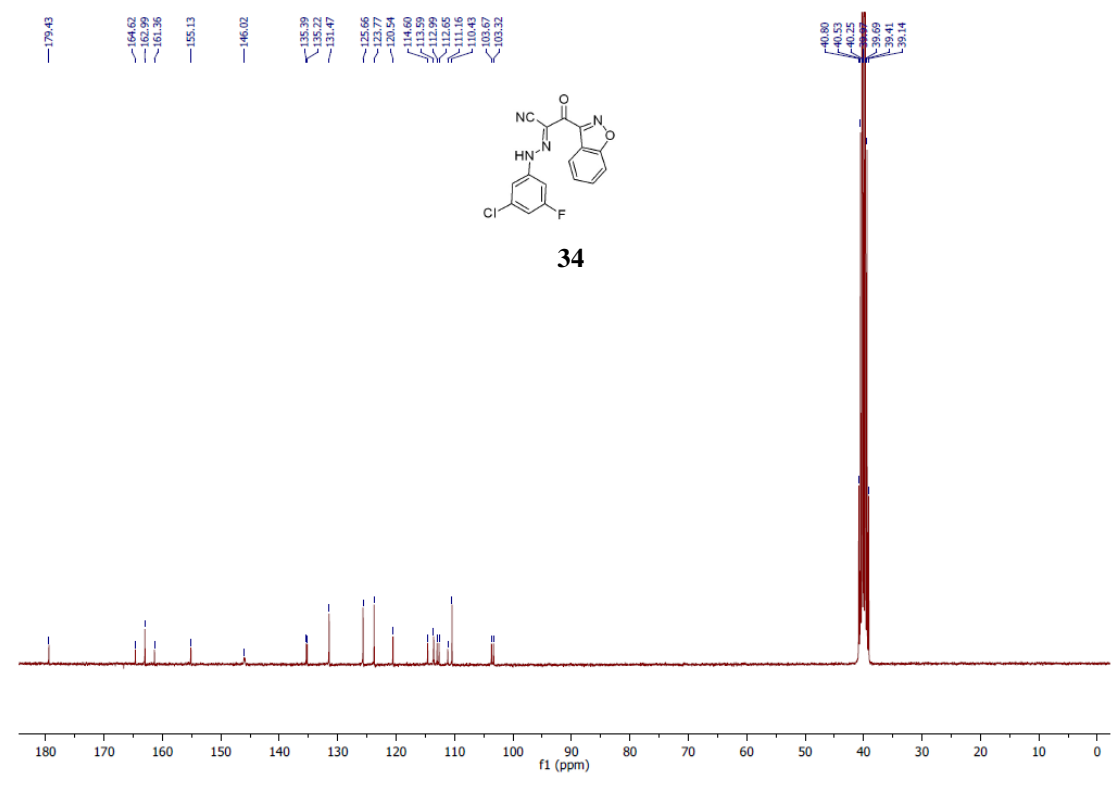

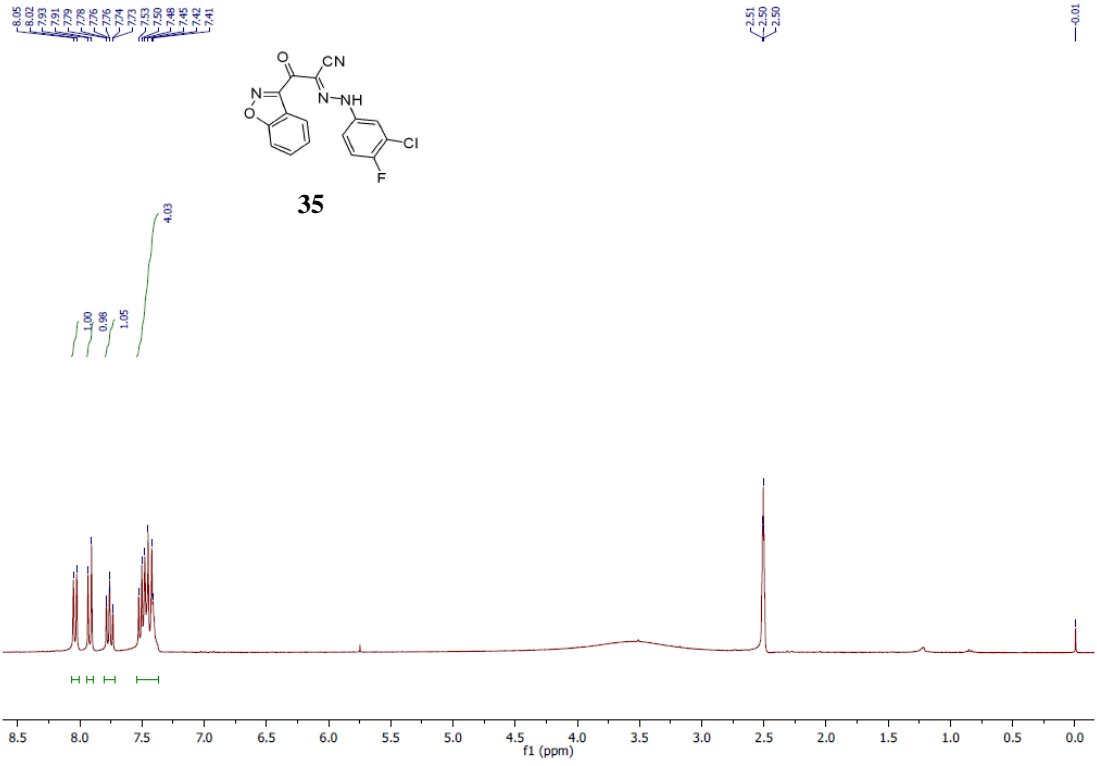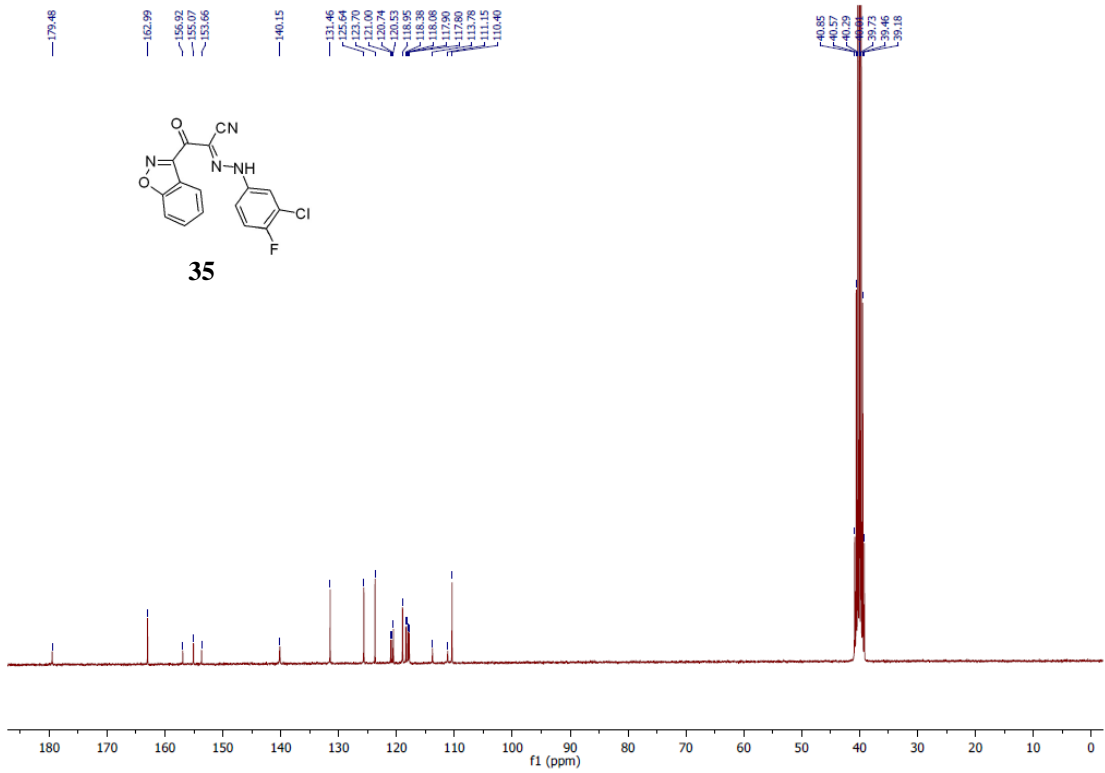

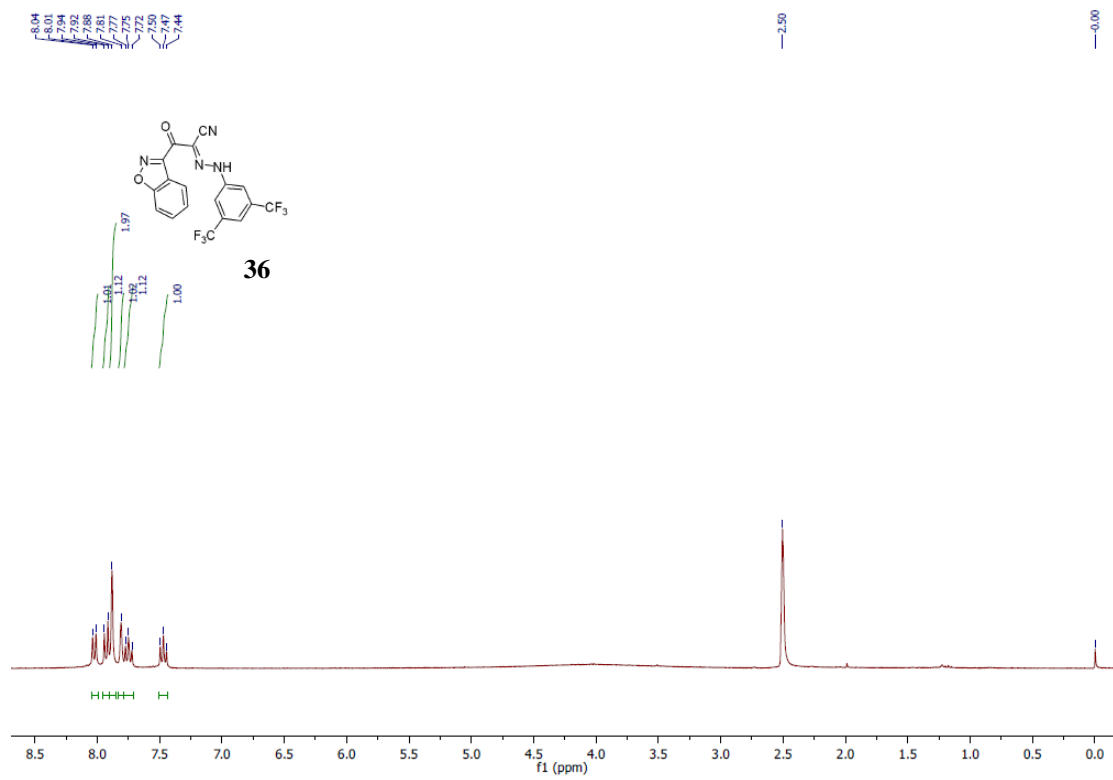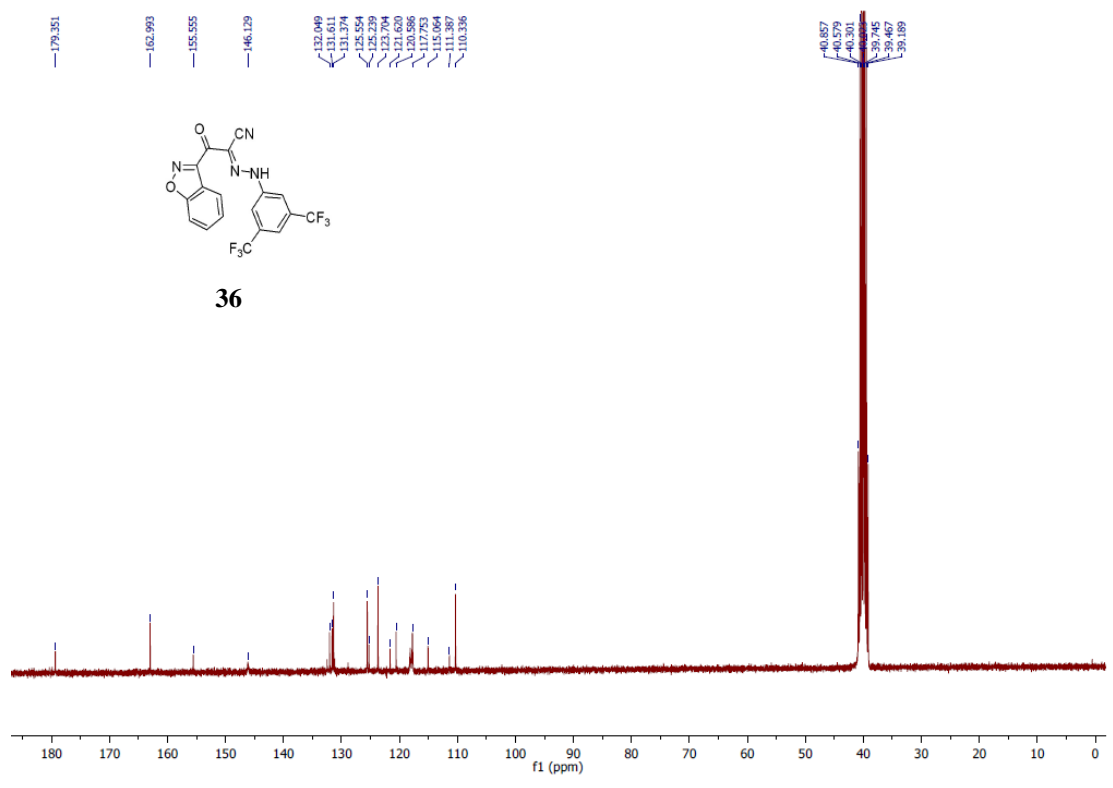

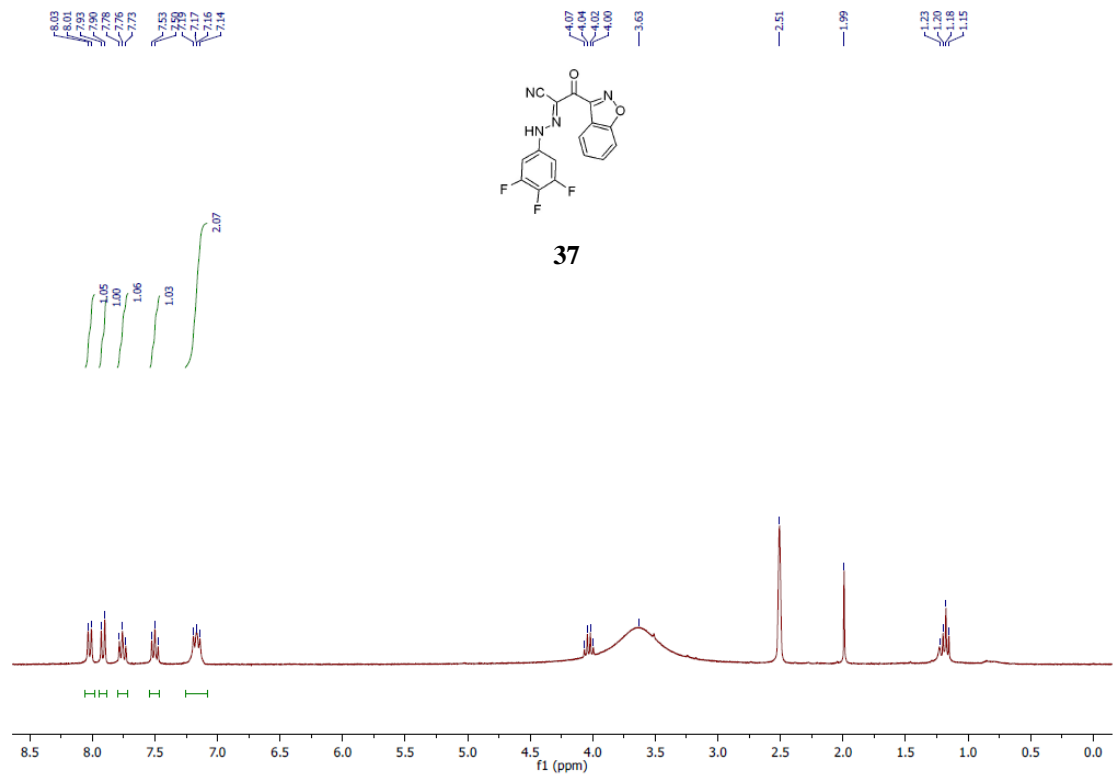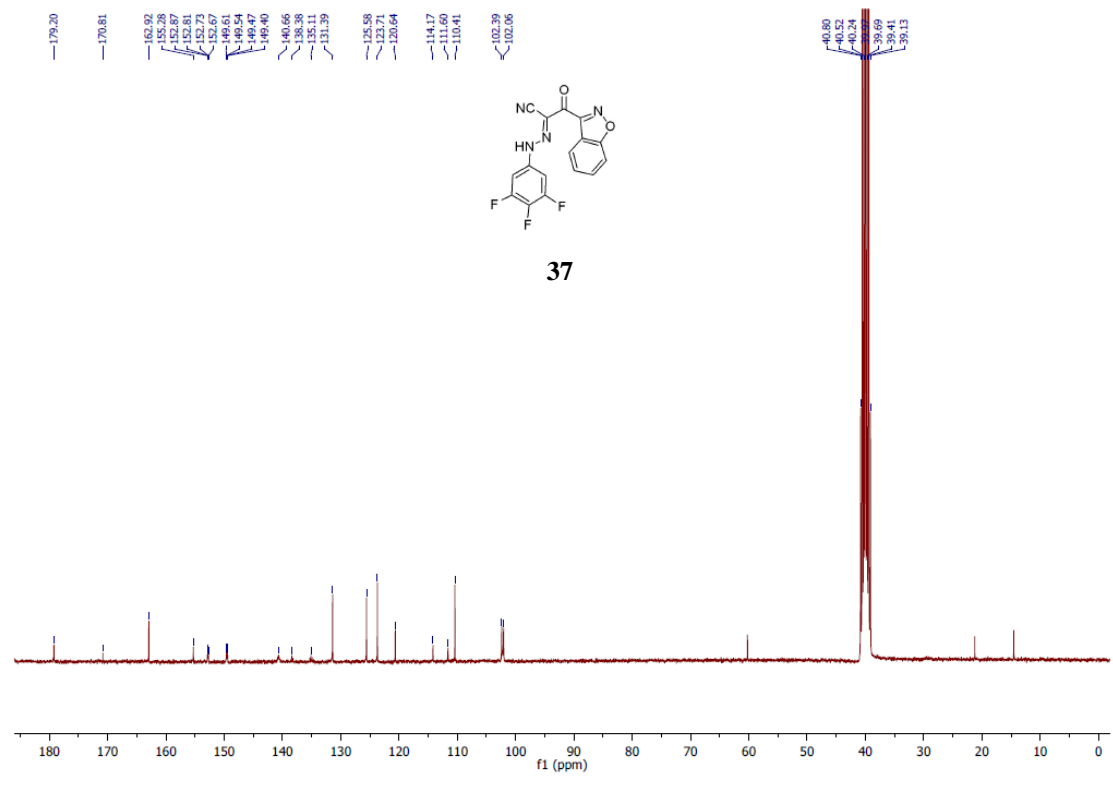

Supplement: NIHMS867091-supplement.pdf [file NIHMS867091-supplement.pdf]
